# Supplementary material for: Design and synthesis of a bivalent probe targeting the putative mu opioid receptor and chemokine receptor CXCR4 heterodimer
Source: PubMed Central journal article supplement — RSC Med Chem. 2019 Dec 19;11(1):125–31. doi: 10.1039/c9md00433e (PMC7451026; doi:10.1039/c9md00433e), 2019-12-19

**Electronic Supplementary Information**

**Design and Synthesis of a Bivalent Probe Targeting the  
Putative Mu Opioid Receptor and Chemokine Receptor  
CXCR4 Heterodimer**

Bethany A. Reinecke, Guifeng Kang, Yi Zheng, Samuel Obeng,  
Huijun Zhang, Dana E. Selley, Jing An, and Yan Zhang<sup>\*</sup>

## Experimental

### *Chemical Syntheses*

All reagents were purchased from Sigma-Aldrich or as otherwise stated. Melting points were obtained with a Fisher Scientific micro melting point apparatus without further correction. All IR spectra were recorded on a Nicolet iS10 FT-IR Instrument. Proton (400 MHz) and carbon-13 (100 MHz) nuclear magnetic resonance (NMR) spectra were acquired at ambient temperature with tetramethylsilane as the internal standard on a Bruker Ultrashield 400 Plus spectrometer. HRMS (ESI) analysis was performed on Perkin Elmer AxION 2 TOF mass spectrometer. HPLC analysis of the final compounds was achieved on Varian ProStar 210 system on Microsorb-MV 100-5 C18 column (250 mm × 4.6 mm) at 254 nm eluting with acetonitrile (0.01% TFA):water, 40:60 – 0:100 (1 & 3) or 45:55 – 0:100 (2), at 0.65 mL/min over 30 min. TLC analyses were carried out on Analtech Uniplate F254 plates. Chromatographic purification was accomplished on silica gel columns (230~400 mesh, Merck). Yields were not maximized.

**General procedure for amide coupling** – On an ice-water bath, a solution of acid in DMF, was added EDCI (2 eq.), HOBt (2 eq.), 4Å molecular sieves, and TEA (4.0 eq.) under N<sub>2</sub> protection. After 30 minutes, a solution of amine (1.0 eq.) in DMF was added dropwise. The resultant mixture was allowed to warm up to room temperature. After reaction completion, the mixture was filtered through celite. Solvent was removed in vacuum and the product was purified using column chromatography or recrystallization.

**6β-naltrexamine hydrochloride salt** The title compound was prepared following the reported procedure<sup>63</sup> in 60% yield in two steps. <sup>1</sup>H NMR (400 MHz, DMSO-*d*<sub>6</sub>): δ 9.63 (s, 1H, exchangeable), 8.93 (brs, 1H, exchangeable), 8.56 (brs, 3H, exchangeable), 6.83 (d, *J* = 8.0 Hz,

1H), 6.66 (d,  $J = 8.0$  Hz, 1H), 6.47 (brs, 1H), 4.71 (d,  $J = 7.2$  Hz, 1H), 3.94 (d,  $J = 5.6$  Hz, 1H), 3.35-3.27 (m, 2H), 3.06-3.00 (m, 2H), 2.92-2.87 (m, 1H), 2.78-2.74 (m, 1H), 2.46-2.44 (m, 2H), 2.01 (q,  $J = 12.8$ , 1H), 1.85 (d,  $J = 14.0$  Hz, 1H), 1.79-1.75 (m, 1H), 1.44 (d,  $J = 8.8$  Hz, 1H), 1.29 (td,  $J_1 = 13.6$  Hz,  $J_2 = 2.4$  Hz, 1H), 1.12-1.05 (m, 1H), 0.70-0.63 (m, 1H), 0.62-0.56 (m, 1H), 0.55-0.49 (m, 1H), 0.42-0.36 (m, 1H).  $^{13}\text{C}$  NMR (100 MHz, DMSO- $d_6$ ):  $\delta$  141.62, 141.54, 129.06, 120.70, 119.83, 118.26, 88.08, 69.40, 61.28, 56.71, 52.35, 46.30, 45.62, 28.74, 27.14, 22.96, 21.39, 5.71, 5.08, 2.65.

**3-(chloromethyl)-5,6-dihydro-6,6-dimethylimidazo[2,1-b]thiazole hydrochloride (5)** A mixture of 4,4-dimethyl-imidazolidine-2-thione (500 mg, 3.84 mmol), 1,3-dichloroacetone (500 mg, 3.84 mmol), and acetonitrile (10 mL) was refluxed for 2 hr. The white precipitate was filtered off, dried, suspended in 1-methoxy-2-(2-methoxy-ethoxy)-ethane (5 mL), and subsequently heated at 145 °C for 2 hr. The precipitate was filtered off and washed with ether to give the hydrochloride product (571 mg, 56.3 %).  $^1\text{H}$  NMR (400 MHz, DMSO- $d_6$ /D $_2$ O = 10:1):  $\delta$  7.07 (s, 1H), 4.85 (s, 2H), 4.22 (s, 2H), 1.50 (s, 6H).  $^{13}\text{C}$  NMR (100 MHz, DMSO- $d_6$ /D $_2$ O = 10:1):  $\delta$  168.38, 133.30, 111.16, 69.47, 57.92, 35.96, 27.47. IR  $\nu$  (Diamond,  $\text{cm}^{-1}$ ) 3094, 2986, 2851, 2788, 1551, 1303, 1130. HRMS calc.  $m/z$  for  $[\text{C}_8\text{H}_{11}\text{ClN}_2\text{S}]$ : 202.0331, found: 203.0379 (M+H) $^+$ .

**trans-4-[(tert-butoxycarbonylamino)methyl]cyclohexanecarboxylic acid (6)** To a solution of *trans*-4-(aminomethyl)cyclohexane-1-carboxylic acid (500 mg, 3.18 mmol) and NaHCO $_3$  (600 mg, 7.14 mmol) in 10 mL water, added a solution of Boc $_2$ O (834 mg, 3.82 mmol) in 1,4-dioxane (10 mL) at -5 °C. The pH was adjusted to 7-8 with additional NaHCO $_3$  (400 mg, 4.79 mmol). After stirred for 10 min, the solution was returned to room temperature and stirred for 24 hr. After 24 hr, 1,4-dioxane was removed under vacuum to give a white residue. The residue was extracted with

1:1 EtOAc/hexane system. The aqueous layer was cooled on ice bath and acidified to pH = 2 with HCl to give a white solid precipitate. The precipitate was filtered and washed with EtOAc to give the product (398 mg, 57%) <sup>1</sup>H NMR (400 MHz, DMSO-*d*<sub>6</sub>): δ 12.01 (s, 1H, exchangeable), 6.78 (t, *J* = 5.5 Hz, 1H, exchangeable), 2.76 (t, *J* = 6.4 Hz, 2H), 2.09 (tt, *J*<sub>1</sub> = 3.6 Hz, *J*<sub>2</sub> = 12.2 Hz, 1H), 1.88-1.86 (m, 2H), 1.70-1.68 (m, 2H), 1.37 (s, 9H), 1.32-1.18 (m, 3H), 0.91-0.81 (m, 2H). <sup>13</sup>C NMR (100 MHz, DMSO-*d*<sub>6</sub>): δ 176.66, 155.65, 77.20, 45.95, 42.60, 37.33, 29.32, 28.21. IR  $\nu$  (Diamond, cm<sup>-1</sup>) 3366, 2924, 1686, 1522, 1251, 1166. HRMS calc. *m/z* for [C<sub>13</sub>H<sub>23</sub>NO<sub>4</sub>]: 257.1627, found: 256.1551(M-H)<sup>-</sup>.

**(*tert*-butoxy-*N*-({*trans*-4-[(phenylmethoxy)carbonyl-amino]cyclohexyl}methyl) carboxamide**

**(7)** To a flask, **6** (250 mg, 0.971 mmol) was suspended in toluene (7 mL) and chilled in an ice-water bath under N<sub>2</sub>. DPPA (267 mg, 0.971 mmol) and TEA (147 mg, 1.46 mmol) was added. The mixture was then warmed to room temperature and slowly heated to 80 °C. After 24 hr, the mixture was cooled to 35 °C and benzyl alcohol (340 mg, 3.15 mmol) was added via syringe. The mixture was heated to 80 °C and stirred for 24 hr. The reaction was concentrated in vacuum and the residue was treated with water (30 mL) and EtOAc (30 mL). The aqueous layer was extracted with EtOAc (30 mL). The combined organic layers were washed with concentrated HCl (25 mL), aqueous sodium bicarbonate (25 mL), and brine (25 mL), then dried over Na<sub>2</sub>SO<sub>4</sub> and concentrated in vacuum to afford the white solid product (120 mg, 23.9%). <sup>1</sup>H NMR (400 MHz, DMSO-*d*<sub>6</sub>): δ 7.38-7.28 (m, 5H), 7.10 (d, *J* = 8.0 Hz, 1H, exchangeable), 6.75 (t, *J* = 5.6 Hz, 1H, exchangeable), 4.99 (s, 2H), 3.25-3.16 (m, *J* = 4.0 Hz, 1H), 2.75 (t, *J* = 6.4 Hz, 2H), 1.81-1.78 (m, 2H), 1.67-1.64 (m, 2H), 1.37 (s, 9H), 1.31-1.22 (m, 1H), 1.16-1.06 (m, 2H), 0.93-0.84 (m, 2H). <sup>13</sup>C NMR (100 MHz, DMSO-*d*<sub>6</sub>): δ 155.62, 155.18, 137.22, 128.21, 127.62, 127.59, 77.19, 64.92, 49.78, 45.74, 37.04, 32.03, 28.98, 28.19. IR  $\nu$  (Diamond, cm<sup>-1</sup>) 3346, 2930, 1626, 1439, 1521, 1245, 1171.

HRMS calc.  $m/z$  for  $[C_{20}H_{30}N_2O_4]$ : 362.2206, found 385.2054 ( $M+Na$ )<sup>+</sup>.

***tert*-butyl ((*trans*-4-aminocyclohexyl)methyl)carbamate (8)** A solution of **7** (100 mg, 0.276 mmol) in methanol (15 mL) was treated with Pd/C (10 mg, 10% wt). The resultant solution was reacted at 10 psi H<sub>2</sub> for 3 hr at room temperature. The reaction mixture was filtered through celite pad and washed with methanol to yield a white solid (84 mg, 100%). <sup>1</sup>H NMR (400 MHz, CDCl<sub>3</sub>): δ 4.59 (s, 1H), 2.97-2.94 (m, 4H), 2.68-2.61 (m, 1H), 1.90-1.88 (m, 2H), 1.77-1.74 (m, 2H), 1.43 (s, 9H), 1.39-1.35 (m, 1H), 1.17-1.07 (m, 2H), 1.02-0.91 (m, 2H). <sup>13</sup>C NMR (100 MHz, CDCl<sub>3</sub>): δ 156.21, 79.22, 50.77, 46.61, 37.83, 35.56, 29.51, 28.58. IR  $\nu$  (Diamond, cm<sup>-1</sup>) 3344, 2929, 2848, 1683, 1530, 1246, 1168. HRMS calc.  $m/z$  for  $[C_{12}H_{24}N_2O_2]$ : 228.1838, found: 229.1845 ( $M+H$ )<sup>+</sup>.

**Isothiocyanatocyclohexane (9)** To a solution of cyclohexylamine (1.00g, 10.08 mmol), and triethylamine (3.36 g, 33.26 mmol) in 10 mL THF, carbon disulfide (767 mg, 10.08 mmol) was added in 40 min at 0 °C. The resulted solution was stirred at room temperature for 2 hr. The mixture was cooled to 0 °C and 4-toluene sulfonyl chloride (2.11g, 11.09 mmol) was added. The mixture was allowed to warm to room temperature and stirred for 2 hr. 1M Hydrochloric acid (20 mL) was then added. The mixture was extracted with hexane and Et<sub>2</sub>O (1:1, 20 mL). The combined organic layers were dried over Na<sub>2</sub>SO<sub>4</sub> and concentrated in vacuum. The resulting residue was purified by column chromatography to yield a clear oil (893 mg, 63%). <sup>1</sup>H NMR (400 MHz, DMSO-*d*<sub>6</sub>): δ 3.90 (m,  $J = 4.0$  Hz, 1H), 1.89-1.83 (m, 2H), 1.60-1.57 (m, 4H), 1.44-1.34 (m, 4H). <sup>13</sup>C NMR (100 MHz, DMSO-*d*<sub>6</sub>): δ 128.39, 54.91, 32.42, 24.43, 22.59. IR  $\nu$  (Diamond, cm<sup>-1</sup>) 2933, 2856, 2174, 2092, 2056, 1448, 1360, 1310, 1134.

***tert*-Butyl (((1*r*,4*r*)-4-(3-cyclohexylthioureido)cyclohexyl)methyl)carbamate (10)** To a solution of **9** (100 mg, 0.71 mmol) in 10 mL CH<sub>2</sub>Cl<sub>2</sub> was added **8** (162 mg, 0.71 mmol). After

stirring at room temperature for 24 hr, the solvent was removed in vacuum. The white residue was recrystallized using Et<sub>2</sub>O to yield a white powder (189 mg, 72%). <sup>1</sup>H NMR (400 MHz, DMSO-*d*<sub>6</sub>): δ 7.13 (t, *J* = 7.6 Hz, 2H, exchangeable), 6.80 (t, *J* = 5.65, 1H), 3.87 (bs, 2H), 2.76 (t, *J* = 6.4 Hz, 2H), 1.92-1.83 (m, 4H), 1.67-1.57 (m, 5H), 1.37 (m, 9H), 1.32-1.22 (s, 3H), 1.31-1.02 (m, 5H), 0.94-0.85 (m, 2H). <sup>13</sup>C NMR (100 MHz, DMSO-*d*<sub>6</sub>): δ 179.98, 155.61, 77.18, 52.02, 51.39, 45.69, 37.09, 32.24, 31.78, 28.96, 28.19, 25.12, 24.38. IR ν (Diamond, cm<sup>-1</sup>) 3374, 2936, 1685, 1556, 1406, 1297, 1152. HRMS calc. *m/z* for [C<sub>19</sub>H<sub>35</sub>N<sub>3</sub>O<sub>2</sub>S]: 369.2450, found: 392.2322 (M+Na)<sup>+</sup>.

**tert-Butyl (((1*r*,4*r*)-4-(((*Z*)-(cyclohexylamino))((6,6-dimethyl-5,6-dihydroimidazo[2,1-*b*]thiazol-3-yl)methyl)thio)methylene)amino)cyclohexyl)methyl)carbamate (11)** A solution of **10** (50 mg, 0.135 mmol) and **5** (32 mg, 0.135 mmol) in 3 mL acetonitrile was refluxed for 24 hr. The precipitate was filtered off and recrystallized from methanol/ether to give the product (43 mg, 51%). <sup>1</sup>H NMR (400 MHz, DMSO-*d*<sub>6</sub>/D<sub>2</sub>O = 10:1): δ 6.88 (s, 1H), 4.88 (s, 2H), 4.27 (s, 2H), 3.88 (s, 1H), 3.67 (s, 1H), 2.78 (m, 2H), 1.71-1.54 (m, 13H), 1.50 (s, 6H), 1.37 (s, 9H), 1.30-0.95 (m, 6H). <sup>13</sup>C NMR (100 MHz, DMSO-*d*<sub>6</sub>/D<sub>2</sub>O = 10:1): δ 168.34, 160.32, 155.72, 131.36, 110.22, 77.40, 69.29, 58.15, 56.30, 53.34, 45.61, 45.48, 40.08, 36.74, 32.07, 31.41, 30.96, 30.33, 28.51, 28.23, 28.04, 27.36, 24.51, 24.32. IR ν (Diamond, cm<sup>-1</sup>) 3333, 2929, 1698, 1610, 1499, 1250, 1172, 1027. HRMS calc. *m/z* for [C<sub>27</sub>H<sub>45</sub>N<sub>5</sub>O<sub>2</sub>S<sub>2</sub>]: 535.3015, found: 536.2936 (M+H)<sup>+</sup>.

**aminomethyl-substituted IT1t (4)** To a solution of **11** (500 mg, 0.821 mmol) in 10 mL CH<sub>2</sub>Cl<sub>2</sub> was added TFA (1 mL). After being stirred for 0.5 hr, Et<sub>2</sub>O (20 mL) was added. The precipitate

was filtered off and washed again with Et<sub>2</sub>O to give a white solid as the trifluoroacetic acid salt (511 mg, 70.4 %). <sup>1</sup>H NMR (400 MHz, DMSO-*d*<sub>6</sub>): δ 10.56 (s, 1H, exchangeable), 9.52 (s, 1H, exchangeable), 9.37 (s, 1H, exchangeable), 7.91 (s, 3H, exchangeable), 6.85 (s, 1H), 4.67 (s, 2H), 4.22 (s, 2H), 3.77-3.69 (m, 2H), 2.66 (m, 2H), 1.84-1.71 (m, 8H), 1.62-1.56 (m, 2H), 1.50 (s, 6H), 1.46-1.25 (m, 5H), 1.08-0.97 (m, 3H). <sup>13</sup>C NMR (100 MHz, DMSO-*d*<sub>6</sub>): δ 168.40, 160.50, 158.35, 131.27, 116.95, 110.24, 69.33, 58.03, 56.38, 55.76, 53.23, 52.86, 43.97, 43.85, 34.34, 32.07, 30.99, 30.01, 28.09, 27.86, 27.37, 24.55, 24.28. IR ν (Diamond, cm<sup>-1</sup>) 2936, 1669, 1607, 1556, 1451, 1310, 1126. HRMS calc. m/z for [C<sub>22</sub>H<sub>37</sub>N<sub>5</sub>S<sub>2</sub>]: 435.2490, found: 436.2321 (M+H)<sup>+</sup>.

**benzyl 6-aminohexylcarbamate (12)** To a solution of 1,6-diaminohexane (2.32 g, 20 mmol) in CH<sub>2</sub>Cl<sub>2</sub>-MeOH (100 mL: 100 mL) was added a solution of CbzCl (3.08 g, 18 mmol) in CH<sub>2</sub>Cl<sub>2</sub> (200 mL) dropwise over 8 hr while keeping the temperature below 0 °C. The mixture was stirred at the same temperature for another 16 hr before the solvent was removed under vacuum. The white residue was then dissolved in 100 mL water and acidified to pH = 2 using concentrated HCl. The resulting residue was then extracted using CH<sub>2</sub>Cl<sub>2</sub> and stirred on ice. The organic solution was then basified using NaOH solution until pH = 12. The residue was then extracted again using CH<sub>2</sub>Cl<sub>2</sub>. The organic layer was dried with Na<sub>2</sub>SO<sub>4</sub> and concentrated in vacuum to yield a white solid (2.03 g, 40.6 %) <sup>1</sup>H NMR (400 MHz, CDCl<sub>3</sub>): δ 7.36-7.34 (m, 4H), 7.33-7.29 (m, 1H), 5.10 (s, 2H), 4.72 (s, 1H, exchangeable), 3.19 (q, *J* = 6.8 Hz, 2H), 2.68 (t, *J* = 6.4 Hz, 2H), 1.55-1.48 (m, 2H), 1.45-1.41 (m, 2H), 1.35-1.32 (m, 4H), 1.26 (s, 2H). <sup>13</sup>C NMR (100 MHz, CDCl<sub>3</sub>): δ 156.55, 136.87, 128.66, 128.22, 66.76, 42.21, 41.20, 33.76, 30.13, 26.71, 26.65. IR ν (Diamond, cm<sup>-1</sup>) 3332, 2940, 2855, 1682, 1524, 1453, 1302, 1282, 1255, 1228, 1133, 1096, 1000. HRMS calc. m/z for [C<sub>14</sub>H<sub>22</sub>N<sub>2</sub>O<sub>2</sub>]: 250.1681, found: 251.1760 (M+H)<sup>+</sup>.

**3,12-dioxo-1-phenyl-2,14-dioxo-4,11-diazahexadecan-16-oic acid (13)** To a stirring solution of **12** (6.09 g, 24.3 mmol) in 50 mL THF was added diglycolic anhydride (2.96 g, 25.5 mmol) in three portions. The resultant mixture was stirred at ambient temperature for 23 hr. After THF was removed under reduced pressure, the residue was crystallized by EtOAc–hexane to give a white solid (6.91g, 77%). <sup>1</sup>H NMR (400 MHz, DMSO-*d*<sub>6</sub>): δ 12.78 (s, 1H, exchangeable), 7.80 (bs, 1H, exchangeable), 7.40-7.28 (m, 5H), 7.19 (bs, 1H, exchangeable), 5.00 (s, 2H), 4.10 (s, 2H), 3.94 (s, 2H), 3.08 (q, *J* = 6.8 Hz, 2H), 2.98 (q, *J* = 6.8 Hz, 2H), 1.42-1.37 (m, 4H), 1.24 (br, 4H). <sup>13</sup>C NMR (100 MHz, DMSO-*d*<sub>6</sub>): δ 171.32, 168.45, 155.99, 137.26, 128.23, 127.61, 70.16, 67.88, 64.99, 38.00, 29.25, 28.97, 25.96, 25.84. IR ν (Diamond, cm<sup>-1</sup>) 3338, 3305, 2959, 2928, 1690, 1651, 1541, 1264, 1237, 1172, 1141, 1008. HRMS calc. *m/z* for [C<sub>18</sub>H<sub>26</sub>N<sub>2</sub>O<sub>6</sub>]: 366.1791, found: 389.1674 (M+Na)<sup>+</sup>.

**Benzyl (6-(2-(2-(((4R,4aS,7R,7aR)-3-(cyclopropylmethyl)-4a,9-dihydroxy-2,3,4,4a,5,6,7,7a-octahydro-1H-4,12-methanobenzofuro[3,2-*e*]isoquinolin-7-yl)amino)-2-**

**oxoethoxy)acetamido)hexyl)carbamate (14)** The title compound was prepared according to the general amide coupling procedure by reacting **13** with 6β-naltrexamine hydrochloride salt in DMF. The resulting residue was dissolved in MeOH and 5 eq. of K<sub>2</sub>CO<sub>3</sub> was added and stirred for 24 hr. After 24 hr, the K<sub>2</sub>CO<sub>3</sub> was filtered out and the solution was concentrated to dryness to afford a brown solid. The solid was purified with column chromatography (CH<sub>2</sub>Cl<sub>2</sub>-MeOH, 30:1) and recrystallized with MeOH/Et<sub>2</sub>O to afford an orange solid product (1.21 g, 72%) <sup>1</sup>H NMR (400 MHz, CDCl<sub>3</sub>): δ 7.60 (d, *J* = 9.2 Hz, 1H, exchangeable), 7.35-7.28 (m, 5H), 7.02 (t, *J* = 5.6 Hz, 1H, exchangeable), 6.71 (m, 1H), 6.55 (m, 1H), 5.09 (s, 2H), 4.95 (t, *J* = 5.6 Hz, 1H, exchangeable), 4.43 (d, *J* = 6.0 Hz, 1H), 4.11-3.99 (m, 4H), 3.31-3.24 (m, 2H), 3.21-3.17 (m, 2H),



3.09 (d,  $J = 6.0$  Hz, 1H), 3.02 (d,  $J = 18.4$  Hz, 1H), 2.64-2.58 (m, 2H), 2.40-2.30 (m, 2H), 2.23-2.14 (m, 2H), 1.84-1.74 (m, 1H), 1.66-1.60 (m, 1H), 1.53-1.45 (m, 7H), 1.35-1.34 (m, 4H), 1.14-1.11 (m, 1H), 0.85-0.75 (m, 1H), 0.55-0.50 (m, 2H), 0.14-0.10 (m, 2H).  $^{13}\text{C}$  NMR (100 MHz,  $\text{CDCl}_3$ ):  $\delta$  168.82, 168.61, 156.78, 143.32, 139.61, 136.76, 130.75, 128.65, 128.23, 128.18, 124.76, 119.32, 117.89, 92.39, 77.36, 71.09, 71.06, 70.27, 66.81, 62.56, 59.54, 49.68, 47.37, 46.17, 44.03, 40.84, 38.85, 31.94, 30.00, 29.56, 29.17, 26.32, 26.11, 23.37, 22.77, 9.57, 4.12, 3.96. IR  $\nu$  (Diamond,  $\text{cm}^{-1}$ ) 3297, 2929, 1651, 1538, 1505, 1454, 1323, 1239, 1126. HRMS calc.  $m/z$  for  $[\text{C}_{38}\text{H}_{50}\text{N}_4\text{O}_8]$ : 690.3629, found: 691.3459 ( $\text{M}+\text{H}$ ) $^+$ .

**N-(6-aminohexyl)-2-(2-(((4R,4aS,7R,7aR)-3-(cyclopropylmethyl)-4a,9-dihydroxy-2,3,4,4a,5,6,7,7a-octahydro-1H-4,12-methanobenzofuro[3,2-e]isoquinolin-7-yl)amino)-2-**

**oxoethoxy)acetamide (15)** A solution of **14** (250 mg, 0.36 mmol) in methanol (20 mL) was hydrogenated in the presence of 10% Pd/C (25 mg) under a  $\text{H}_2$  atmosphere (10 psi) at room temperature for 3 hr. The mixture was filtered, and the filtrate was concentrated to a white foam (200 mg, 99%)  $^1\text{H}$  NMR (400 MHz,  $\text{DMSO}-d_6$ ):  $\delta$  8.24 (d,  $J = 8.4$  Hz, 1H, exchangeable), 8.05 (t,  $J = 5.2$  Hz, 1H, exchangeable), 6.57 (m, 1H), 6.52 (m, 1H), 4.89 (brs, 1H, exchangeable), 4.59 (d,  $J = 7.6$  Hz, 1H), 3.94 (m, 4H), 3.56-3.48 (m, 1H), 3.14 (m,  $J = 6.4$  Hz, 2H), 3.01-2.94 (m, 2H), 2.60-2.56 (m, 2H), 2.38-2.28 (m, 2H), 2.15 (dt,  $J_1 = 4.4$  Hz,  $J_2 = 12.0$  Hz, 1H), 1.97 (dt,  $J_1 = 3.2$  Hz,  $J_2 = 12.0$  Hz, 1H), 1.84-1.75 (m, 1H), 1.46-1.44 (m, 4H), 1.33-1.23 (m, 9H), 0.87-0.79 (m, 1H), 0.48-0.46 (m, 2H), 0.11 (m, 2H).  $^{13}\text{C}$  NMR (100 MHz,  $\text{DMSO}-d_6$ ):  $\delta$  168.36, 168.19, 142.06, 140.51, 131.20, 123.30, 118.32, 117.07, 90.43, 70.40, 70.35, 69.53, 61.72, 58.35, 50.62, 46.99, 43.64, 41.43, 38.09, 33.10, 30.25, 30.02, 29.15, 26.27, 26.05, 24.56, 22.13, 9.19, 3.62, 3.49. IR  $\nu$

(Diamond,  $\text{cm}^{-1}$ ) 3269, 2924, 1651, 1548, 1454, 1373, 1322, 1258, 1127, 1034. HRMS calc.  $m/z$  for  $[\text{C}_{30}\text{H}_{44}\text{N}_4\text{O}_6]$ : 556.3261, found: 557.3213 ( $\text{M}+\text{H}$ )<sup>+</sup>.

**18-(((4R,4aS,7R,7aR)-3-(cyclopropylmethyl)-4a,9-dihydroxy-2,3,4,4a,5,6,7,7a-octahydro-1H-4,12-methanobenzofuro[3,2-e]isoquinolin-7-yl)amino)-5,14,18-trioxo-3,16-dioxo-6,13-diazaoctadecanoic acid (16)** Diglycolic anhydride (125 mg, 1.08 mmol) was added to the solution of **15** (600 mg, 1.08 mmol) in DMF (5 mL). The resultant mixture was stirred at ambient temperature for 3 hr. After removal of DMF under reduced pressure, the residue was recrystallized by MeOH/Et<sub>2</sub>O to give a white solid (586 mg, 80%). <sup>1</sup>H NMR (400 MHz, DMSO-*d*<sub>6</sub>):  $\delta$  8.70 (br, 1H, exchangeable), 8.36 (d,  $J = 8.4$  Hz, 1H, exchangeable), 8.20 (br, 1H, exchangeable), 6.62 (m, 1H), 6.53 (m, 1H), 4.66 (d,  $J = 7.6$  Hz, 1H), 3.95 -3.93 (m, 8H), 3.56-3.48 (m, 1H), 3.15-3.00 (m, 6H), 2.70-2.60 (m, 2H), 2.55-2.52 (m, 1H), 2.43-2.39 (m, 1H), 2.20 (dt,  $J_1 = 4.0$  Hz,  $J_2 = 12.0$  Hz, 1H), 2.09-2.02 (m, 1H), 1.87-1.78 (m, 1H), 1.50-1.33 (m, 6H), 1.29-1.24 (m, 6H), 0.90-0.87 (m, 1H), 0.49 (m,  $J = 7.2$  Hz, 2H), 0.17-0.16 (m, 2H). <sup>13</sup>C NMR (100 MHz, DMSO-*d*<sub>6</sub>):  $\delta$  168.37, 168.16, 142.04, 140.61, 130.97, 122.84, 118.37, 117.13, 90.31, 70.35, 70.31, 69.51, 61.71, 58.10, 50.56, 46.75, 44.00, 37.96, 29.96, 29.76, 28.94, 28.88, 25.90, 25.87, 24.39, 22.25, 8.62, 3.75, 3.78. IR  $\nu$  (Diamond,  $\text{cm}^{-1}$ ) 2931, 1651, 1599, 1504, 1432, 1393, 1253, 1126, 1034. HRMS calc.  $m/z$  for  $[\text{C}_{34}\text{H}_{48}\text{N}_4\text{O}_{10}]$ : 672.3370, found: 673.3519 ( $\text{M}+\text{H}$ )<sup>+</sup>.

**2-(2-(methylamino)-2-oxoethoxy)acetic acid (17)** To a cooled 2M solution of methylamine in THF (10 mL), diglycolic anhydride (2.00 g, 17.2 mmol) was added. The resulted solution was stirred for 5 min on ice bath and then allowed to continue at ambient temperature for 24 hr. The resulting yellow oil was concentrated under vacuum and recrystallized using MeOH-Et<sub>2</sub>O to yield

an off white solid (1.704g, 67%).  $^1\text{H}$  NMR (400 MHz, DMSO- $d_6$ ):  $\delta$  8.07 (s, 1H, exchangeable), 4.00 (s, 2H), 3.92 (s, 2H), 2.62 (d,  $J$  = 4.72 Hz, 3H).  $^{13}\text{C}$  NMR (100 MHz, DMSO- $d_6$ ):  $\delta$  171.28, 169.08, 70.13, 67.83, 25.11. IR  $\nu$  (Diamond,  $\text{cm}^{-1}$ ) 3387, 2919, 2524, 1707, 1627, 1258, 1203, 1130, 1084. HRMS calc.  $m/z$  for  $[\text{C}_5\text{H}_9\text{NO}_4]$ : 147.0532, found: 146.4232 (M-H) $^-$ .

**benzyl (6-(2-(2-(methylamino)-2-oxoethoxy)acetamido)hexyl)carbamate (18)** The title compound was prepared according to the general amide coupling procedure by reacting acid **17** with amine **12**. The residue was then purified using column chromatography ( $\text{CH}_2\text{Cl}_2$ -MeOH, 20:1) to afford the product (2.79 g, 50%)  $^1\text{H}$  NMR (400 MHz, DMSO- $d_6$ ):  $\delta$  7.97 (m, 2H, exchangeable), 7.35 (m, 5H), 7.27 (m, 1H, exchangeable), 5.00 (s, 2H), 3.93 (m, 4H), 3.12 (m, 2H), 2.98 (m, 2H), 2.66 (d,  $J$  = 4.68 Hz, 3H), 2.51 (m, 2H), 1.40 (m, 4H), 1.26 (m, 4H).  $^{13}\text{C}$  NMR (100 MHz, DMSO- $d_6$ ):  $\delta$  168.87, 168.27, 156.06, 137.32, 128.28, 128.08, 127.66, 127.62, 70.32, 65.05, 40.22, 40.01, 39.80, 39.59, 39.38, 39.17, 38.96, 38.06, 29.53, 29.31, 29.15, 26.04, 25.89, 25.06. IR  $\nu$  (Diamond,  $\text{cm}^{-1}$ ) 3337, 2924, 2855, 1690, 1652, 1543, 1454, 1435, 1407, 1367, 1279, 1148, 1124, 1059. HRMS calc.  $m/z$  for  $[\text{C}_{19}\text{H}_{29}\text{N}_3\text{O}_5]$ : 379.2107, found: 402.2018 (M+Na) $^+$ .

***N*-(6-aminohexyl)-2-(2-(methylamino)-2-oxoethoxy)acetamide (19)** A solution of **18** (400 mg, 1.21 mmol) and Pd/C (40 mg, 10%) in 25 mL MeOH was shaken at 60 psi of  $\text{H}_2$ . After 24 hr the solution was filtered through celite and concentrated under vacuum. The residue was recrystallized using MeOH:Et $_2$ OH to afford a white solid (258 mg, 100%)  $^1\text{H}$  NMR (400 MHz, DMSO- $d_6$ ):  $\delta$  8.00 (br, 2H, exchangeable), 3.90 (m, 4H), 3.13-3.08 (m, 2H), 2.65 (d,  $J$  = 4.68 Hz, 3H), 2.54-2.52 (m, 1H), 1.44-1.39 (m, 2H), 1.35-1.31 (m, 2H), 1.26 (m, 4H)  $^{13}\text{C}$  NMR (100 MHz, DMSO- $d_6$ ):  $\delta$  70.29, 48.55, 41.32, 40.19, 39.98, 39.77, 39.56, 39.36, 39.15, 38.94, 38.07, 32.79, 29.21, 26.27,

26.04, 25.06. IR  $\nu$  (Diamond,  $\text{cm}^{-1}$ ) 3318, 2924, 2855, 1652, 1548, 1432, 1338, 1124, 1004. HRMS calc.  $m/z$  for  $[\text{C}_{11}\text{H}_{23}\text{N}_3\text{O}_3]$ : 245.1739, found: 246.1798 ( $\text{M}+\text{H}$ )<sup>+</sup>.

**3,7,16-trioxo-5,18-dioxa-2,8,15-triazaicosan-20-oic acid (20)** To a 25 mL flask added **19** (188 mg, 0.770 mmol), diglycolic anhydride (95 mg, 0.880 mmol), and 3 mL  $\text{CH}_2\text{Cl}_2$ . After 24 hr of stirring at ambient temperature, the solution was concentrated under vacuum to afford a faint yellow oil. Recrystallization using MeOH:Et<sub>2</sub>OH afforded a faint yellow solid (157 mg, 56%) <sup>1</sup>H NMR (400 MHz, DMSO-*d*<sub>6</sub>):  $\delta$  7.99 (m, 2H, exchangeable), 7.82 (m, 1H, exchangeable), 4.10 (s, 2H), 3.94 (s, 2H), 3.90(s, 4H), 3.13-3.06 (m, 4H), 2.65 (d,  $J = 4.68$  Hz, 3H), 1.42 (m, 4H), 1.25 (m, 4H) <sup>13</sup>C NMR (100 MHz, DMSO-*d*<sub>6</sub>):  $\delta$  171.31, 168.81, 168.47, 168.20, 70.23, 70.15, 67.87, 40.13, 39.92, 39.71, 39.50, 39.30, 39.09, 38.88, 37.97, 37.96, 29.07, 28.94, 25.96, 25.94, 25.00. IR  $\nu$  (Diamond,  $\text{cm}^{-1}$ ) 3310, 2930, 1651, 1538, 1469, 1417, 1362, 1338, 1124, 1036. HRMS calc.  $m/z$  for  $[\text{C}_{15}\text{H}_{27}\text{N}_3\text{O}_7]$ : 361.1849, found: 384.1774 ( $\text{M}+\text{Na}$ )<sup>+</sup>.

**Bivalent ligand (1)** The title compound was prepared according to the general amide coupling procedure by reacting **16** with the aminomethyl-substituted Itlt **4** in DMF. The resulting crude residue was purified using column chromatography ( $\text{CH}_2\text{Cl}_2$ -MeOH, 10:1) to afford the product (104 mg, 38%). <sup>1</sup>H NMR (400 MHz, DMSO-*d*<sub>6</sub>)  $\delta$  9.01 (m, 1H, exchangeable), 8.21 (m, 1H, exchangeable), 8.19-8.01 (m, exchangeable, 3H), 6.58 (m, 1H), 6.52 (m, 1H), 4.59 (d,  $J = 7.80$  Hz, 1H), 3.94 (m, 8H), 3.29 (s, 14H), 3.16 (m, 6H), 3.01 (m, 3H), 2.94 (m, 2H) 2.84 (m, 2H), 2.69 (m, 3H) 2.57 (m, 3H) 2.33 (m, 3H), 2.18-2.11 (m, 1H), 2.00-1.95 (m, 1H), 1.69 (m, 6H), 1.46 (m, 9H) 1.27 (m, 10H), 1.20 (m, 9H), 1.00-0.90 (m, 2H), 0.82 (m, 2H), 0.47 (m, 2H) 0.14 (m, 2H). <sup>13</sup>C NMR (100 MHz, DMSO-*d*<sub>6</sub>):  $\delta$  169.31, 168.50, 168.38, 168.24, 141.00, 141.10, 119.05, 117.71, 89.72, 83.47, 70.31, 69.58, 63.36, 61.65, 55.65, 55.42, 50.26, 45.73, 43.89, 43.03, 40.09, 39.88,

39.68, 39.47, 39.26, 39.05, 38.84, 38.00, 36.64, 33.85, 33.64, 33.23, 30.17, 29.42, 29.06, 28.61, 28.37, 27.67, 27.41, 26.09, 25.96, 25.43, 24.97, 23.74, 23.61, 22.77. IR  $\nu$  (Diamond,  $\text{cm}^{-1}$ ) 3611, 3451, 3252, 3003, 1657, 1553, 1501, 1466, 1430, 1361, 1202, 1188, 1128, 1059. HRMS calc.  $m/z$  for  $[\text{C}_{56}\text{H}_{83}\text{N}_9\text{O}_9\text{S}_2]$ : 1089.5755, found: 1090.5825 ( $\text{M}+\text{H}$ )<sup>+</sup>.

**MOR Monovalent Control (2)** The title compound was prepared according to the general amide coupling procedure by reacting **20** with 6 $\beta$ -naltrexamine hydrochloride salt. After starting material was consumed, the reaction mixture was filtered through celite and concentrated under vacuum. The resulting residue was dissolved in 5 mL MeOH and stirred at room temperature with  $\text{K}_2\text{CO}_3$  (120 mg, 0.875 mmol). After 24 hr,  $\text{K}_2\text{CO}_3$  was filtered out and the filtrate was concentrated to dryness to afford a brown solid. The residue was then purified using column chromatography ( $\text{CH}_2\text{Cl}_2$ -MeOH, 5:1) to afford the product (45 mg, 19%).  $^1\text{H}$  NMR (400 MHz,  $\text{DMSO}-d_6$ ):  $\delta$  9.01 (brs, 1H, exchangeable), 8.21 (d,  $J = 8.4$  Hz, 1H, exchangeable), 8.03-7.96 (m, 3H, exchangeable), 6.58 (m, 1H), 6.52 (m, 1H), 4.88 (brs, 1H, exchangeable), 4.59 (d,  $J = 7.6$  Hz, 1H), 3.95 (s, 2H), 3.93 (s, 2H), 3.91 (s, 4H), 3.56-3.48 (m, 1H), 3.17-3.09 (m, 4H), 3.01-2.95 (m, 2H), 2.65 (d,  $J = 4.4$  Hz, 3H), 2.62-2.57 (m, 2H), 2.38-2.28 (m, 2H), 2.19-2.11 (m, 1H), 2.01-1.94 (m, 1H), 1.83-1.74 (m, 1H), 1.46-1.44 (m, 6H), 1.32-1.23 (m, 6H), 0.87-0.81 (m, 1H), 0.48-0.46 (m, 2H), 0.12-0.11 (m, 2H).  $^{13}\text{C}$  NMR (100 MHz,  $\text{DMSO}-d_6$ ):  $\delta$  168.80, 168.33, 168.22, 168.14, 142.02, 140.35, 131.22, 123.40, 118.28, 116.98, 90.43, 70.36, 70.31, 70.24, 69.51, 61.71, 58.34, 50.60, 46.97, 43.62, 38.01, 37.97, 30.24, 29.99, 29.10, 25.98, 25.01, 24.51, 22.13, 9.16, 3.59, 3.46. IR  $\nu$  (Diamond,  $\text{cm}^{-1}$ ) 3288, 2929, 1651, 1548, 1504, 1454, 1323, 1239, 1185, 1124, 1035. HRMS calc.  $m/z$  for  $[\text{C}_{35}\text{H}_{51}\text{N}_5\text{O}_9]$ : 685.3687, found: 686.3595 ( $\text{M}+\text{H}$ )<sup>+</sup>.

**CXCR4 Monovalent Control (3)** The title compound was prepared according to the general amide coupling procedure by reacting **20** with the aminomethyl-substituted It1t **4**. The residue was then purified using column chromatography (CH<sub>2</sub>Cl<sub>2</sub>-MeOH, 30:1) to afford the product (47 mg, 11%) <sup>1</sup>H NMR (400 MHz, DMSO-*d*<sub>6</sub>): δ 8.03-7.95 (m, 4H, exchangeable), 3.92-3.86 (m, 8H), 3.71 (s, 2H), 3.69-3.66 (m, 1H, exchangeable), 3.36-3.12 (m, 2H), 3.15-3.07 (m, 4H), 2.99-2.95 (m, 2H), 2.93-2.87 (m, 2H), 2.83 (m, 2H), 2.65 (d, *J* = 4.6 Hz, 3H), 1.72-1.40 (m, 4H), 1.36-1.26 (m, 3H), 1.20-1.19 (m, 5H), 1.06-1.02 (m, 8H), 1.00-0.98 (d, *J* = 5.8 Hz, 6H), 0.90-0.79 (m, 3H) <sup>13</sup>C NMR (100 MHz, DMSO-*d*<sub>6</sub>): δ 168.90, 168.58, 168.48, 168.30, 148.75, 84.48, 74.29, 70.27, 70.15, 55.51, 54.79, 40.00, 39.79, 39.58, 39.37, 39.16, 38.95, 38.74, 37.87, 36.86, 33.74, 33.32, 29.07, 28.91, 25.97, 24.93, 23.67. IR ν (Diamond, cm<sup>-1</sup>) 3289, 2924, 2850, 2359, 2161, 2027, 1651, 1544, 1435, 1363, 1120, 1031. HRMS calc. *m/z* for [C<sub>37</sub>H<sub>62</sub>N<sub>8</sub>O<sub>6</sub>S<sub>2</sub>]: 778.4234, found: 779.4079 (M+H)<sup>+</sup>.

#### *Radioligand Binding Assay*

The competition-binding assay was conducted to determine the affinity of the bivalent compound and its monovalent control at the mu opioid receptor (MOR) using monoclonal mouse opioid receptor expressed in Chinese hamster ovary (CHO) cell lines. MOR-CHO cells were cultured and maintained in DMEM (90%), and fetal bovine serum 10% (v/v). [<sup>3</sup>H]naloxone ([<sup>3</sup>H]NLX) was used to label the MOR and a saturation assay was conducted to determine the K<sub>d</sub> and B<sub>max</sub> values for [<sup>3</sup>H]NLX at the MOR, which were measured as 1.81 ± 0.16 nM and 2.47 ± 0.20 pmol/mg, respectively. To determine the binding affinity of test compounds, 30 μg of membrane protein was incubated with [<sup>3</sup>H]NLX in the presence of different concentrations of test compounds in TME buffer (50 mM Tris, 3 mM MgCl<sub>2</sub>, and 0.2 mM EGTA, pH 7.7) for 1.5

h at 30 °C. The bound radioligand was separated by filtration using the Brandel harvester. Specific (i.e., opioid receptor-related) binding at the KOR was determined as the difference in binding obtained in the absence and presence of 5  $\mu$ M naltrexone. The IC<sub>50</sub> values were determined and converted to K<sub>i</sub> values using the Cheng–Prusoff equation.

#### *Antibody Binding Assays*

CHO-CXCR4 cells were maintained in RPMI1640 medium supplemented with 10% (v/v) FBS, 100 units/mL penicillin, 100 mg/mL streptomycin and 2 mM L-glutamine, and 400  $\mu$ g/mL geneticin. Following trypsinization, CHO-CXCR4 cells were washed twice with FACS buffer (0.5% BSA, 0.05% sodium azide in PBS). 5 $\times$ 10<sup>5</sup> cells per well with primary antibody (1:2000, mouse anti-human CD184 antibody, BD Biosciences, USA) were seeded in 96-well v-bottom plates at the presence of various concentrations of compounds. After incubation for 40 min on ice, cells were washed twice with FACS buffer, and then incubated with secondary antibody (1:1000, anti-mouse IgG-FITC antibody, Sigma, USA) for 30 min on ice. Cells were washed twice again and re-suspended with FACS buffer. The fluorescence (excitation 485/emission 528) was recorded using a Synergy II plate reader. IC<sub>50</sub>s were calculated by GraphPad Prism from at least three independent experiments.

#### *Calcium Mobilization Assays*

The ligands were first tested with various concentrations (0.3 nM to 3  $\mu$ M) for possible agonist activity in either MOR-CHO or CXCR4-HOS cells. The protocol was the same for the antagonism study for both MOR and CXCR4 cell types, except for the addition of an agonist (either DAMGO or SDF-1).

CXCR4-HOS cells were cultured and maintained in DMEM (90%), fetal bovine serum 10% (v/v), and supplemented with 1.0 µg/ml puromycin. MOR-CHO cells were cultured and maintained in DMEM (90%), and fetal bovine serum 10% (v/v).

Either CXCR4-HOS or MOR-CHO cells were transfected with Gqi5 pcDNA1 (Addgene, Cat# 24501) using Lipofectamine 2000 (Invitrogen) according to the manufacturer's recommended procedure. Cells were incubated for 4 hr at 37 °C and 5% CO<sub>2</sub> and then trypsinized and transferred to a clear bottom, black 96-well plate (Greiner Bio-one) at 3x10<sup>6</sup> cells per well in their respective growth media and incubated until confluent. 48 hours after transfection the growth media was decanted and cells were then incubated with 50 µL of fluo-4 AM loading buffer [24 µL 2 mM fluo-4 AM solution (Invitrogen), 12 µL 250 mM probenecid, in 6 mL assay buffer (HBSS–HEPES–Ca–Mg–probenecid)] for 45 min. Loading buffer was then decanted and cells were incubated for an additional 15 min in 20 µL of each compound in varying concentrations and 60 µL assay buffer. Ca<sup>2+</sup> concentrations were monitored by RFU for 90 seconds right after addition of 20 µL of agonist (DAMGO or SDF-1) to each well in the microplate reader (FlexStation3, Molecular Devices). Peak values were obtained using SoftMaxPro software (Molecular Devices) and non-linear regression curves were generated using Prism (GraphPad) to calculate IC<sub>50</sub> values. All doses were tested with triplicates. All experiments were repeated at least 4 times to obtain standard error values.



Apr.23,2015  
PROTON DMSO /opt/topspin Kang.g 42

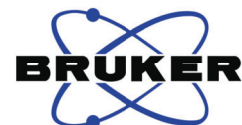

Current Data Parameters  
NAME GK-II-42  
EXPNO 10  
PROCNO 1

F2 - Acquisition Parameters  
Date\_ 20150423  
Time 17.53  
INSTRUM spect  
PROBHD 5 mm PABBO BB-  
PULPROG zg30  
TD 65536  
SOLVENT DMSO  
NS 16  
DS 2  
SWH 8223.685 Hz  
FIDRES 0.125483 Hz  
AQ 3.9845889 sec  
RG 203  
DW 60.800 usec  
DE 6.50 usec  
TE 300.0 K  
D1 1.0000000 sec  
TD0 1

----- CHANNEL f1 -----  
NUC1 1H  
P1 12.00 usec  
PL1 -2.00 dB  
PL1W 15.12807274 W  
SFO1 400.1324710 MHz

F2 - Processing parameters  
SI 32768  
SF 400.1299984 MHz  
WDW EM  
SSB 0  
LB 0.30 Hz  
GB 0  
PC 1.00

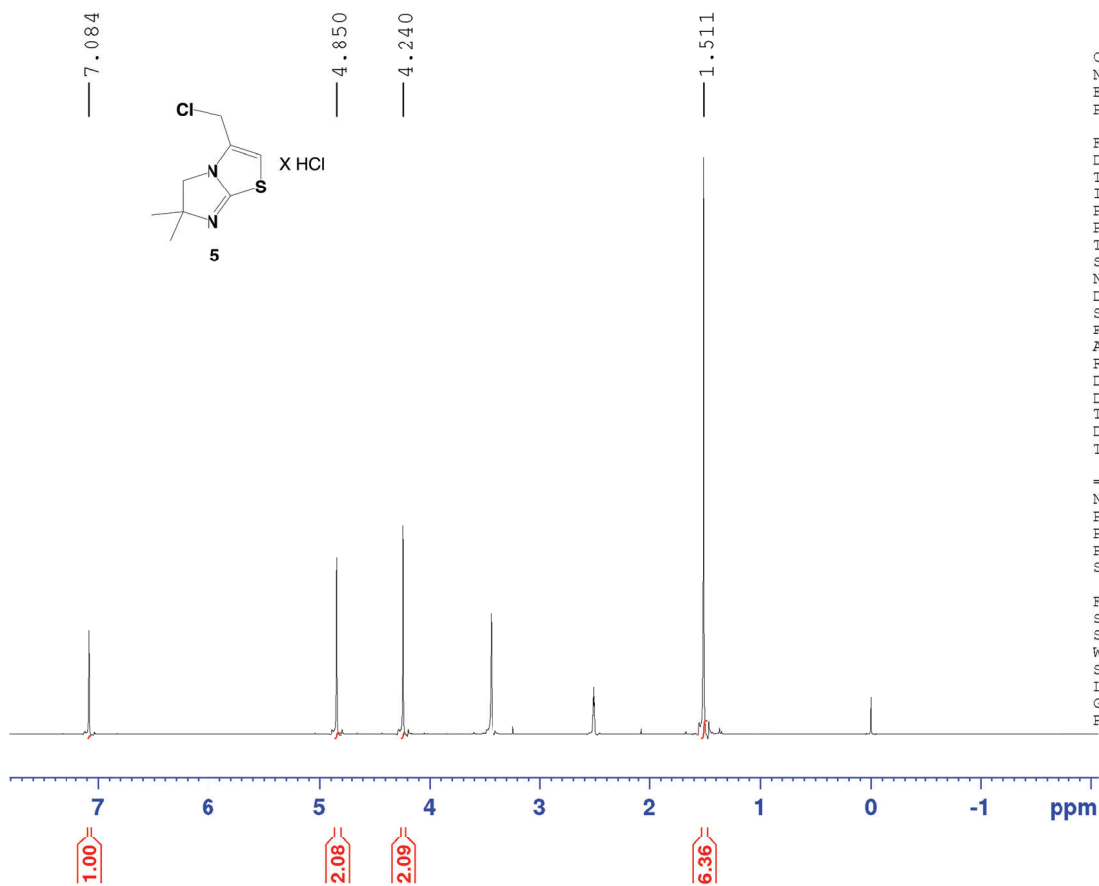

Apr.23,2015  
 C13C2D DMSO /opt/topspin Kang.g 42

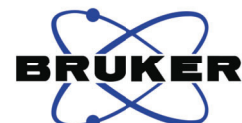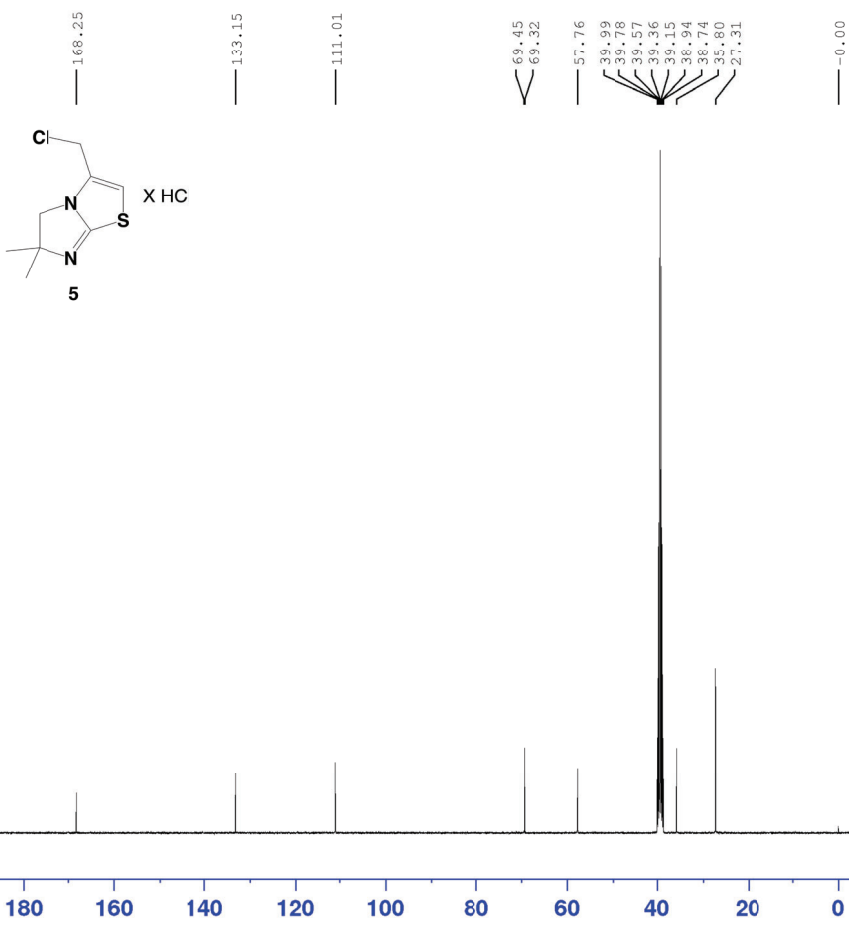

Current Data Parameters  
 NAME GK-II-42\_C  
 EXPNO 10  
 PROCNO 1

F2 - Acquisition Parameters  
 Date\_ 20150423  
 Time 23.02  
 INSTRUM spect  
 PROBHD 5 mm PABBO BB-  
 PULPROG zgpg30  
 TD 65536  
 SOLVENT DMSO  
 NS 4096  
 DS 4  
 SWH 24038.461 Hz  
 FIDRES 0.366798 Hz  
 AQ 1.3631488 sec  
 RG 203  
 DW 20.800 usec  
 DE 6.50 usec  
 TE 301.8 K  
 D1 2.00000000 sec  
 D11 0.03000000 sec  
 TD0 1

===== CHANNEL f1 =====  
 NUC1 13C  
 P1 8.50 usec  
 PL1 -1.70 dB  
 PL1W 55.73028564 W  
 SFO1 100.6228298 MHz

===== CHANNEL f2 =====  
 CPDPRG[2] waltz16  
 NUC2 1H  
 PCPD2 80.00 usec  
 PL2 -2.00 dB  
 PL12 14.50 dB  
 PL13 14.50 dB  
 PL2W 15.12807274 W  
 PL12W 0.33867535 W  
 PL13W 0.33867535 W  
 SFO2 400.1316005 MHz

F2 - Processing parameters  
 SI 32768  
 SF 100.6128258 MHz  
 WDW EM  
 SSB 0  
 LB 1.00 Hz  
 GB 0  
 PC 1.40

May 27, 2015  
 PROT0N DMSO /opt/topspin Kang.g 27

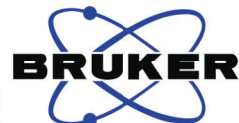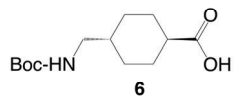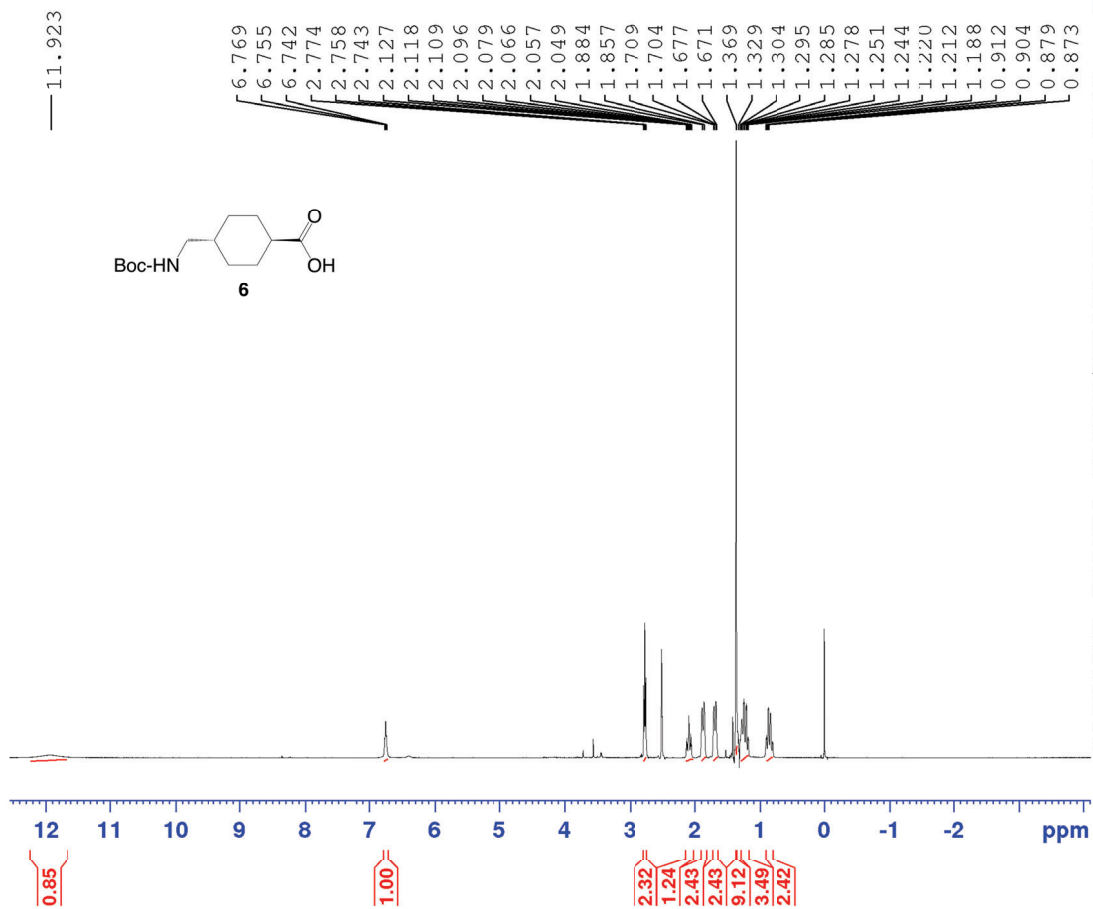

Current Data Parameters  
 NAME GK-II-27  
 EXPNO 10  
 PROCNO 1

F2 - Acquisition Parameters  
 Date\_ 20150527  
 Time 16.49  
 INSTRUM spect  
 PROBHD 5 mm PABBO BB-  
 PULPROG zg30  
 TD 65536  
 SOLVENT DMSO  
 NS 8  
 DS 2  
 SWH 8223.685 Hz  
 FIDRES 0.125483 Hz  
 AQ 3.9845889 sec  
 RG 144  
 DW 60.800 usec  
 DE 6.50 usec  
 TE 303.4 K  
 D1 1.00000000 sec  
 TD0 1

----- CHANNEL f1 -----  
 NUC1 1H  
 P1 12.00 usec  
 PL1 -2.00 dB  
 PL1W 15.12807274 W  
 SFO1 400.1324710 MHz

F2 - Processing parameters  
 SI 32768  
 SF 400.1300045 MHz  
 WDW EM  
 SSB 0  
 LB 0.30 Hz  
 GB 0  
 PC 1.00

May 27, 2015  
 C13C2D DMSO /opt/topspin Kang.g 27

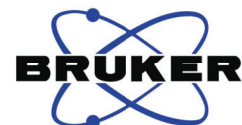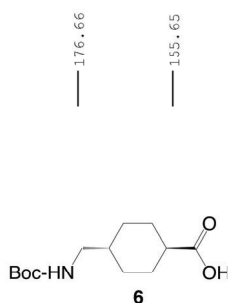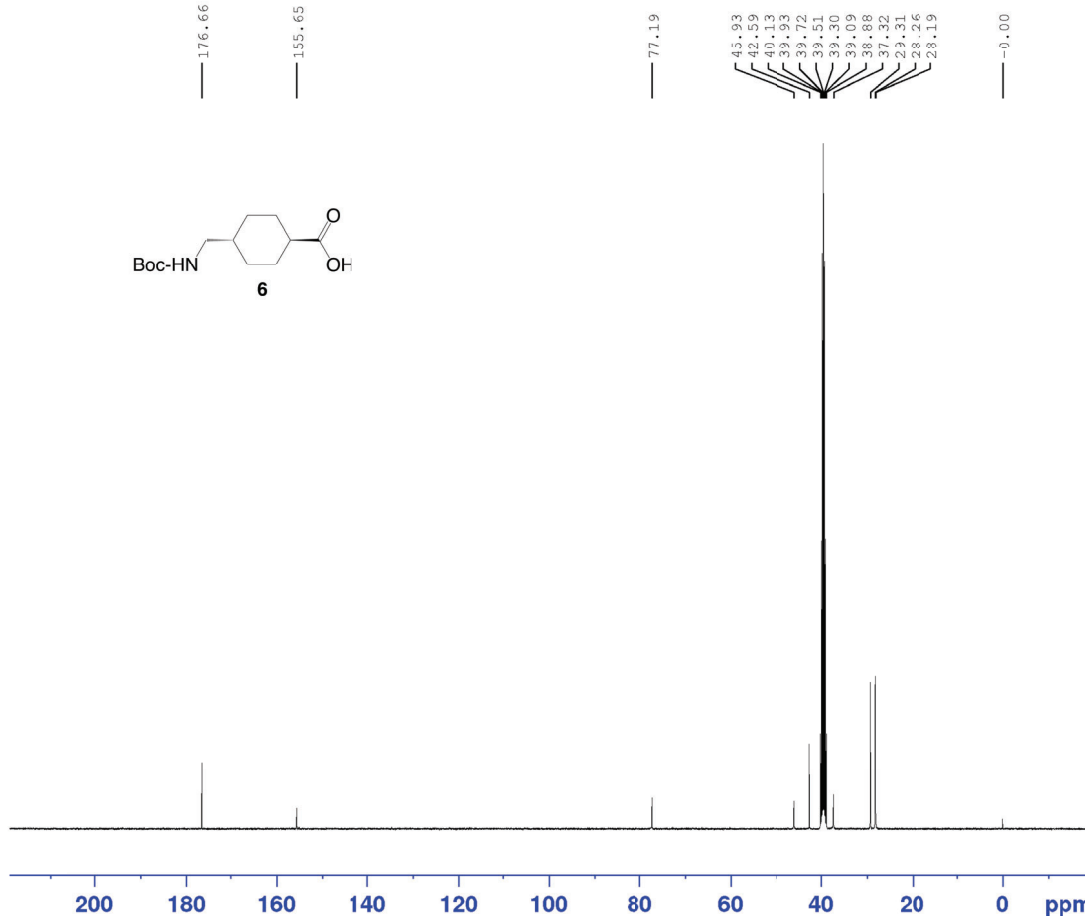

Current Data Parameters  
 NAME GK-II-27\_C  
 EXPNO 10  
 PROCNO 1

F2 - Acquisition Parameters  
 Date\_ 20150528  
 Time 22.57  
 INSTRUM spect  
 PROBHD 5 mm PABBO BB-  
 PULPROG zgpg30  
 TD 65536  
 SOLVENT DMSO  
 NS 5120  
 DS 4  
 SWH 24038.461 Hz  
 FIDRES 0.366798 Hz  
 AQ 1.3631488 sec  
 RG 203  
 DW 20.800 usec  
 DE 6.50 usec  
 TE 305.0 K  
 D1 2.00000000 sec  
 D11 0.03000000 sec  
 TD0 1

===== CHANNEL f1 =====  
 NUC1 13C  
 P1 8.50 usec  
 PL1 -1.70 dB  
 PL1W 55.73028564 W  
 SFO1 100.6228298 MHz

===== CHANNEL f2 =====  
 CPDPRG[2] waltz16  
 NUC2 1H  
 PCPD2 80.00 usec  
 PL2 -2.00 dB  
 PL12 14.50 dB  
 PL13 14.50 dB  
 PL2W 15.12807274 W  
 PL12W 0.33867535 W  
 PL13W 0.33867535 W  
 SFO2 400.1316005 MHz

F2 - Processing parameters  
 SI 32768  
 SF 100.6128250 MHz  
 WDW EM  
 SSB 0  
 LB 1.00 Hz  
 GB 0  
 PC 1.40

Apr. 05, 2015  
 PROT0N DMSO /opt/topspin Kang.g 60

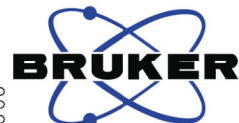

7.377  
 7.363  
 7.359  
 7.356  
 7.351  
 7.342  
 7.338  
 7.325  
 7.322  
 7.319  
 7.315  
 7.311  
 7.305  
 7.297  
 7.110  
 7.091  
 6.760  
 6.747  
 6.734  
 1.989  
 3.224  
 3.214  
 3.204  
 3.195  
 3.185  
 2.767  
 2.751  
 2.735  
 1.806  
 1.780  
 1.673  
 1.642  
 1.367  
 1.262  
 1.254  
 1.246  
 1.125  
 1.095  
 1.089  
 1.064  
 1.058  
 0.929  
 0.901  
 0.868

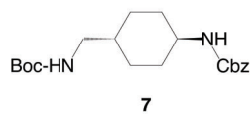

Current Data Parameters  
 NAME GK-II-30a\_DMSO  
 EXPNO 30  
 PROCNO 1

F2 - Acquisition Parameters  
 Date\_ 20150405  
 Time 18.01  
 INSTRUM spect  
 PROBHD 5 mm PABBO BB-  
 PULPROG zg30  
 TD 65536  
 SOLVENT DMSO  
 NS 8  
 DS 2  
 SWH 8223.685 Hz  
 FIDRES 0.125483 Hz  
 AQ 3.9845889 sec  
 RG 181  
 DW 60.800 usec  
 DE 6.50 usec  
 TE 304.6 K  
 D1 1.00000000 sec  
 TD0 1

----- CHANNEL f1 -----  
 NUC1 1H  
 P1 12.00 usec  
 PL1 -2.00 dB  
 PL1W 15.12807274 W  
 SFO1 400.1324710 MHz

F2 - Processing parameters  
 SI 32768  
 SF 400.1300049 MHz  
 WDW EM  
 SSB 0  
 LB 0.30 Hz  
 GB 0  
 PC 1.00

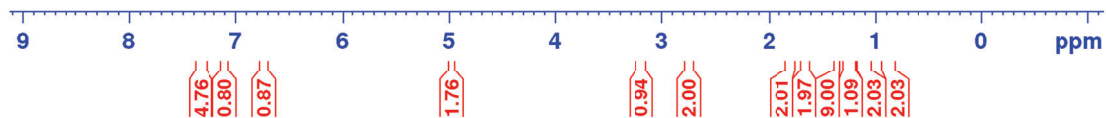

Apr. 05, 2015  
 C13C2D DMSO /opt/topspin Kang.g 60

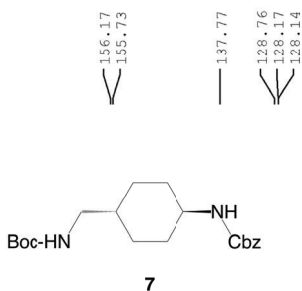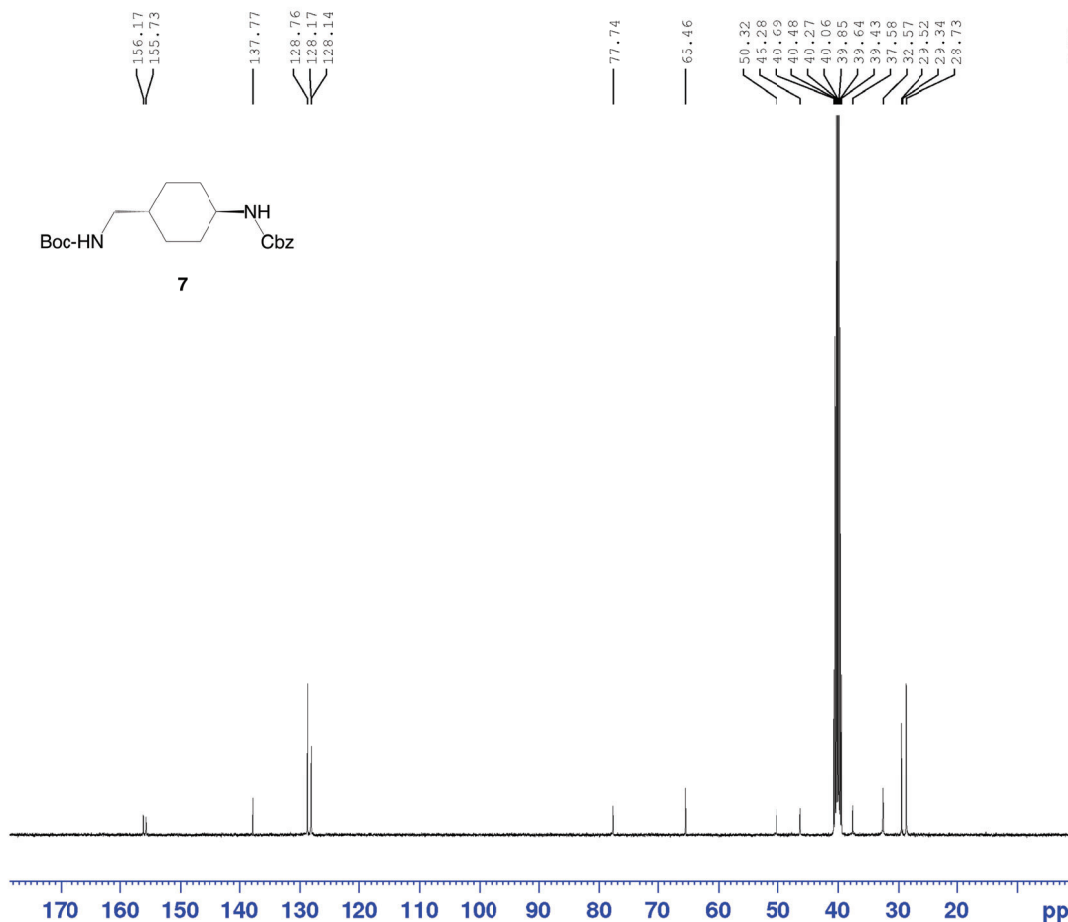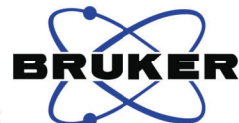

```

Current Data Parameters
NAME      GK-II-30a_DMSO_C
EXPNO     10
PROCNO    1

F2 - Acquisition Parameters
Date_     20150407
Time      0.05
INSTRUM   spect
PROBHD    5 mm PABBO BB-
PULPROG   zgpg30
TD         65536
SOLVENT   DMSO
NS         5120
DS         4
SWH        24038.461 Hz
FIDRES     0.366798 Hz
AQ         1.3631488 sec
RG         203
DW         20.800 usec
DE         6.50 usec
TE         305.7 K
D1         2.00000000 sec
D11        0.03000000 sec
TD0        1

===== CHANNEL f1 =====
NUC1       13C
P1         8.50 usec
PL1        -1.70 dB
PL1W       55.73028564 W
SFO1       100.6228298 MHz

===== CHANNEL f2 =====
CPDPRG[2] waltz16
NUC2       1H
PCPD2      80.00 usec
PL2        -2.00 dB
PL12       14.50 dB
PL13       14.50 dB
PL2W       15.12807274 W
PL12W      0.33867535 W
PL13W      0.33867535 W
SFO2       400.1316005 MHz

F2 - Processing parameters
SI         32768
SF         100.6127711 MHz
WDW        EM
SSB        0
LB         1.00 Hz
GB         0
PC         1.40
  
```

May 28, 2015  
 PROT0N CDCl3 /opt/topspin Kang.g 56

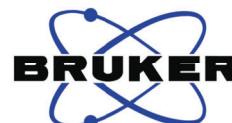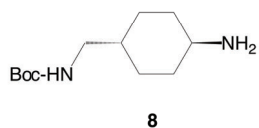

4.605  
 2.982  
 2.966  
 2.951  
 2.695  
 2.685  
 2.675  
 2.667  
 2.648  
 2.640  
 2.630  
 2.620  
 1.922  
 1.895  
 1.782  
 1.751  
 1.438  
 1.398  
 1.391  
 1.181  
 1.173  
 1.148  
 1.141  
 1.113  
 1.088  
 1.081  
 1.028  
 1.022  
 0.996  
 0.966  
 0.959  
 0.934  
 0.926

Current Data Parameters  
 NAME GK-II-33\_CDCl3  
 EXPNO 10  
 PROCNO 1

F2 - Acquisition Parameters  
 Date\_ 20150528  
 Time 16.48  
 INSTRUM spect  
 PROBHD 5 mm PABBO BB-  
 PULPROG zg30  
 TD 65536  
 SOLVENT CDCl3  
 NS 16  
 DS 2  
 SWH 8223.685 Hz  
 FIDRES 0.125483 Hz  
 AQ 3.9845889 sec  
 RG 114  
 DW 60.800 usec  
 DE 6.50 usec  
 TE 302.7 K  
 D1 1.0000000 sec  
 TD0 1

----- CHANNEL f1 -----  
 NUC1 1H  
 P1 12.00 usec  
 PL1 -2.00 dB  
 PL1W 15.12807274 W  
 SFO1 400.1324710 MHz

F2 - Processing parameters  
 SI 32768  
 SF 400.1300052 MHz  
 WDW EM  
 SSB 0  
 LB 0.30 Hz  
 GB 0  
 PC 1.00

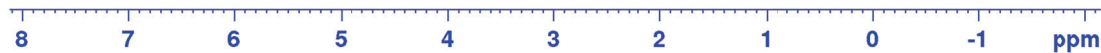

0.72  
 3.80  
 1.00  
 2.02  
 2.09  
 9.27  
 1.26  
 2.09  
 2.14

May 29, 2015  
C13C2D CDC13 /opt/topspin Kang.g 26



Current Data Parameters  
NAME GK-II-33\_CDCl3\_C  
EXPNO 10  
PROCNO 1

F2 - Acquisition Parameters  
Date\_ 20150601  
Time 5.51  
INSTRUM spect  
PROBHD 5 mm PABBO BB-  
PULPROG zgpg30  
TD 65536  
SOLVENT CDCl3  
NS 5120  
DS 4  
SWH 24038.461 Hz  
FIDRES 0.366798 Hz  
AQ 1.3631488 sec  
RG 203  
DW 20.800 usec  
DE 6.50 usec  
TE 303.8 K  
D1 2.00000000 sec  
D11 0.03000000 sec  
TD0 1

===== CHANNEL f1 =====  
NUC1 13C  
P1 8.50 usec  
PL1 -1.70 dB  
PL1W 55.73028564 W  
SFO1 100.6228298 MHz

===== CHANNEL f2 =====  
CPDPRG[2] waltz16  
NUC2 1H  
PCPD2 80.00 usec  
PL2 -2.00 dB  
PL12 14.50 dB  
PL13 14.50 dB  
PL2W 15.12807274 W  
PL12W 0.33867535 W  
PL13W 0.33867535 W  
SFO2 400.1316005 MHz

F2 - Processing parameters  
SI 32768  
SF 100.6127690 MHz  
WDW EM  
SSB 0  
LB 1.00 Hz  
GB 0  
PC 1.40

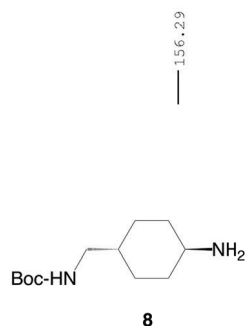

79.18  
77.56  
77.29  
76.98

50.62  
46.66

37.79  
35.66  
29.43  
28.60

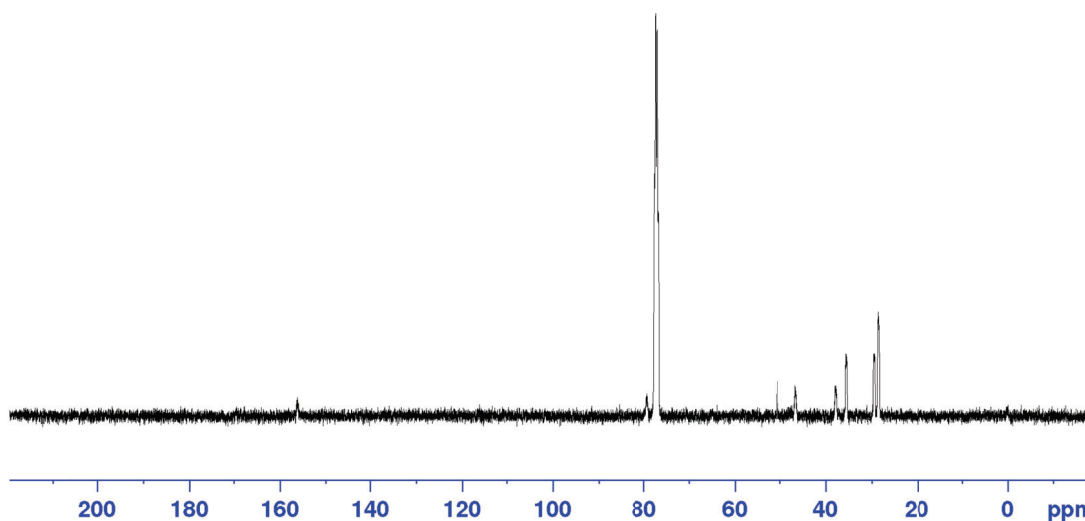



Jan.21,2015  
 PROT9N DMSO /opt/topspin Kang.g 16



3.920  
 3.910  
 3.900  
 3.891  
 3.881

1.883  
 1.871  
 1.851  
 1.841  
 1.828  
 1.611  
 1.603  
 1.592  
 1.584  
 1.577  
 1.569  
 1.412  
 1.396  
 1.389  
 1.382  
 1.368  
 1.355  
 1.351  
 1.342  
 1.334

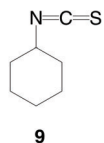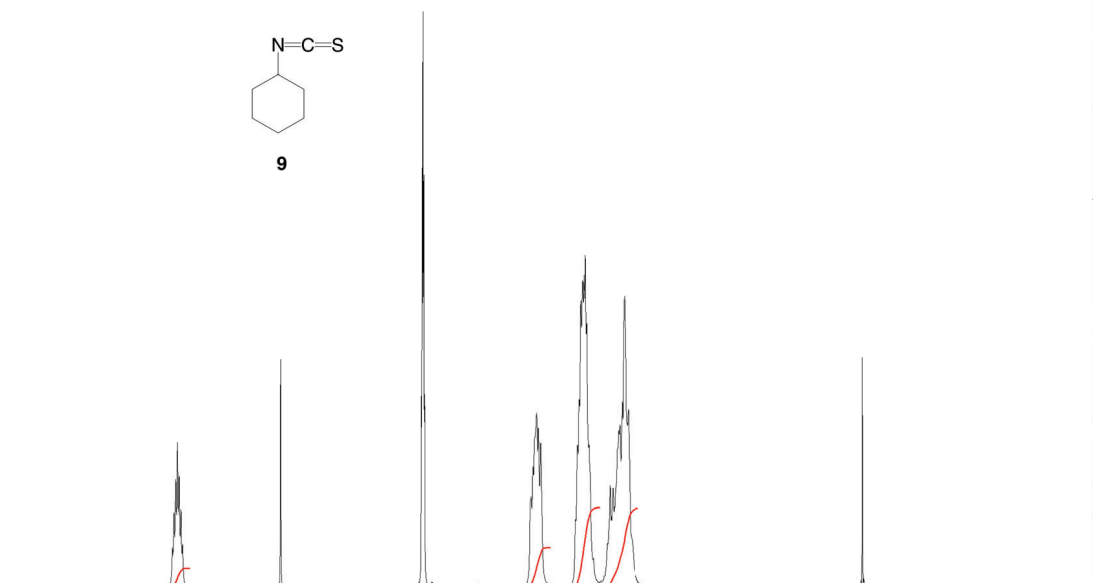

Current Data Parameters  
 NAME GK-I-71  
 EXPNO 10  
 PROCNO 1

F2 - Acquisition Parameters  
 Date\_ 20150121  
 Time 10.10  
 INSTRUM spect  
 PROBHD 5 mm PABBO BB-  
 PULPROG zg30  
 TD 65536  
 SOLVENT DMSO  
 NS 32  
 DS 2  
 SWH 8223.685 Hz  
 FIDRES 0.125483 Hz  
 AQ 3.9845889 sec  
 RG 203  
 DW 60.800 usec  
 DE 6.50 usec  
 TE 298.2 K  
 D1 1.0000000 sec  
 TD0 1

----- CHANNEL f1 -----  
 NUC1 1H  
 P1 12.00 usec  
 PL1 -2.00 dB  
 PL1W 15.12807274 W  
 SFO1 400.1324710 MHz

F2 - Processing parameters  
 SI 32768  
 SF 400.1300045 MHz  
 WDW EM  
 SSB 0  
 LB 0.30 Hz  
 GB 0  
 PC 1.00

4.5 4.0 3.5 3.0 2.5 2.0 1.5 1.0 0.5 0.0 -0.5 ppm

1.00  
 2.09  
 4.24  
 4.19

May 25, 2015  
 PROT0N DMSO /opt/topspin Kang.g 33

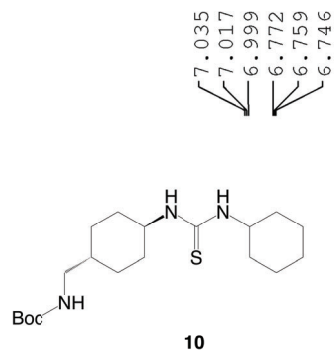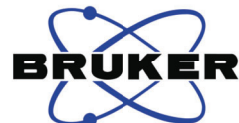

Current Data Parameters  
 NAME GK-I-73b\_DMSOb  
 EXPNO 10  
 PROCNO 1

F2 - Acquisition Parameters  
 Date\_ 20150525  
 Time 19.49  
 INSTRUM spect  
 PROBHD 5 mm PABBO BB-  
 PULPROG zg30  
 TD 65536  
 SOLVENT DMSO  
 NS 16  
 DS 2  
 SWH 8223.685 Hz  
 FIDRES 0.125483 Hz  
 AQ 3.9845889 sec  
 RG 90.5  
 DW 60.800 usec  
 DE 6.50 usec  
 TE 305.1 K  
 D1 1.00000000 sec  
 TD0 1

----- CHANNEL f1 -----  
 NUC1 1H  
 P1 12.00 usec  
 PL1 -2.00 dB  
 PL1W 15.12807274 W  
 SFO1 400.1324710 MHz

F2 - Processing parameters  
 SI 32768  
 SF 400.1300045 MHz  
 WDW EM  
 SSB 0  
 LB 0.30 Hz  
 GB 0  
 PC 1.00

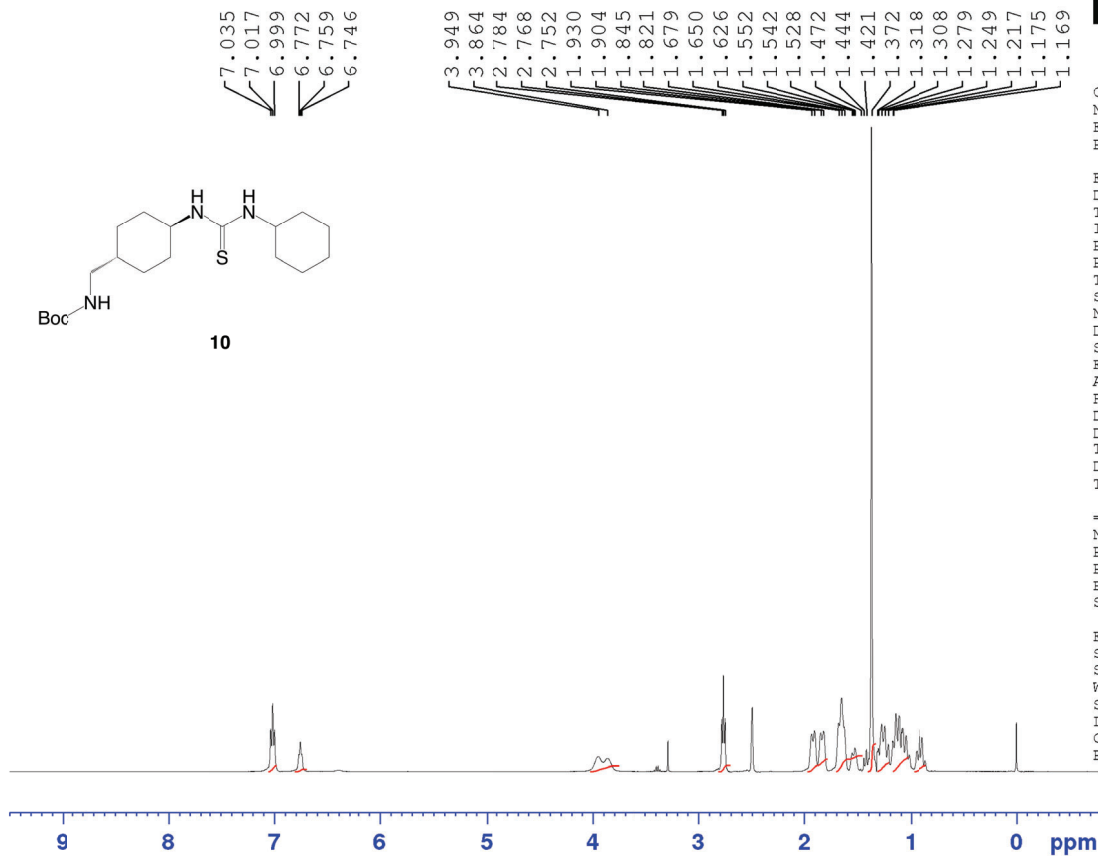

May 25, 2015  
 C13C2D DMSO /opt/topspin Kang.g 33



Current Data Parameters  
 NAME GK-I-73b\_DMSOb\_C  
 EXPNO 10  
 PROCNO 1

F2 - Acquisition Parameters  
 Date\_ 20150526  
 Time 0.48  
 INSTRUM spect  
 PROBHD 5 mm PABBO BB-  
 PULPROG zgpg30  
 TD 65536  
 SOLVENT DMSO  
 NS 5120  
 DS 4  
 SWH 24038.461 Hz  
 FIDRES 0.366798 Hz  
 AQ 1.3631488 sec  
 RG 203  
 DW 20.800 usec  
 DE 6.50 usec  
 TE 306.9 K  
 D1 2.00000000 sec  
 D11 0.03000000 sec  
 TD0 1

===== CHANNEL f1 =====  
 NUC1 13C  
 P1 8.50 usec  
 PL1 -1.70 dB  
 PL1W 55.73028564 W  
 SFO1 100.6228298 MHz

===== CHANNEL f2 =====  
 CPDPRG[2] waltz16  
 NUC2 1H  
 PCPD2 80.00 usec  
 PL2 -2.00 dB  
 PL12 14.50 dB  
 PL13 14.50 dB  
 PL2W 15.12807274 W  
 PL12W 0.33867535 W  
 PL13W 0.33867535 W  
 SFO2 400.1316005 MHz

F2 - Processing parameters  
 SI 32768  
 SF 100.6128250 MHz  
 WDW EM  
 SSB 0  
 LB 1.00 Hz  
 GB 0  
 PC 1.40

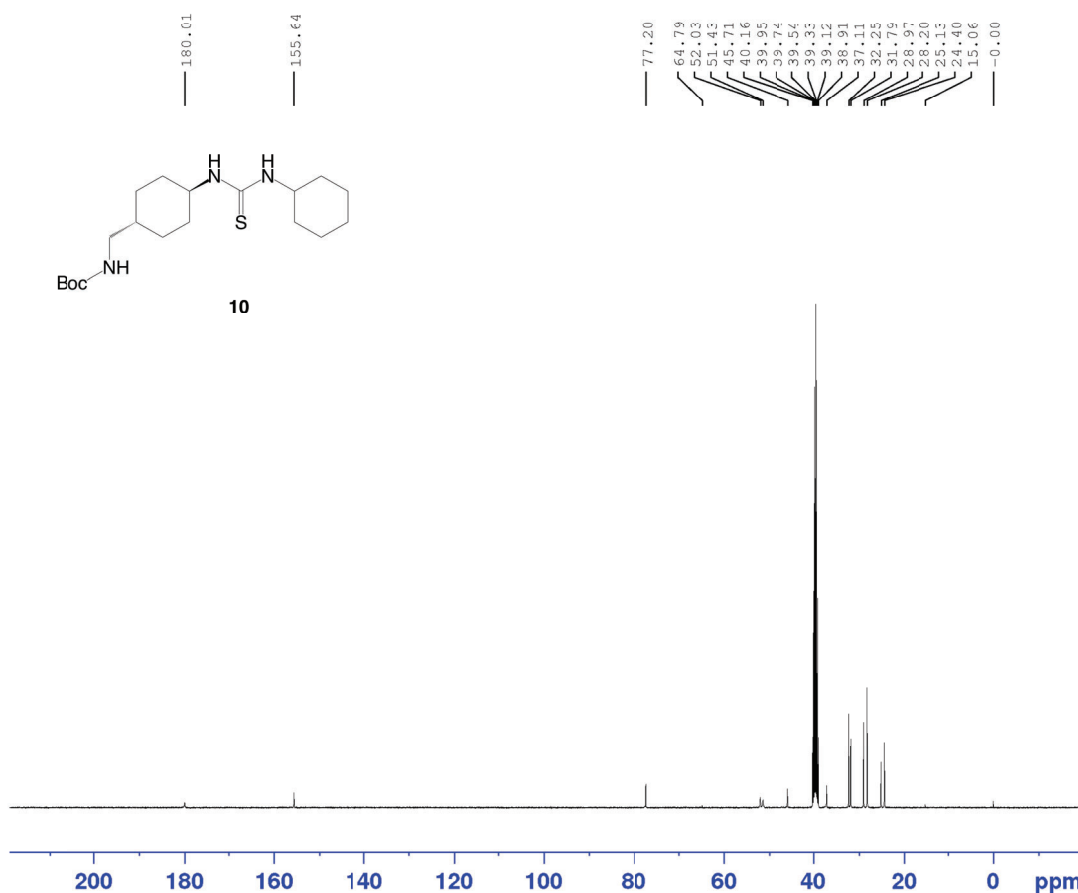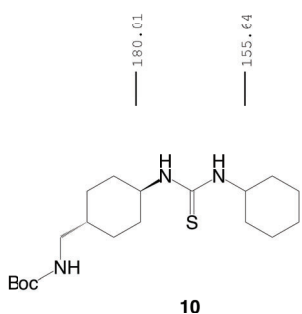

Mar.17,2015  
 PROT0N DMSO /opt/topspin Kang.g 29



6.884  
 4.881  
 4.275  
 3.886  
 3.675  
 2.778  
 2.763  
 1.718  
 1.607  
 1.579  
 1.549  
 1.505  
 1.371  
 1.308  
 1.284  
 1.212  
 1.092  
 0.979  
 0.956

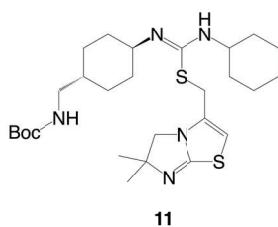

Current Data Parameters  
 NAME GK-II-19b  
 EXPNO 10  
 PROCNO 1

F2 - Acquisition Parameters  
 Date\_ 20150317  
 Time 17.11  
 INSTRUM spect  
 PROBHD 5 mm PABBO BB-  
 PULPROG zg30  
 TD 65536  
 SOLVENT DMSO  
 NS 8  
 DS 2  
 SWH 8223.685 Hz  
 FIDRES 0.125483 Hz  
 AQ 3.9845889 sec  
 RG 80.6  
 DW 60.800 usec  
 DE 6.50 usec  
 TE 303.2 K  
 D1 1.00000000 sec  
 TD0 1

----- CHANNEL f1 -----  
 NUC1 1H  
 P1 12.00 usec  
 PL1 -2.00 dB  
 PL1W 15.12807274 W  
 SFO1 400.1324710 MHz

F2 - Processing parameters  
 SI 32768  
 SF 400.1300000 MHz  
 WDW EM  
 SSB 0  
 LB 0.30 Hz  
 GB 0  
 PC 1.00

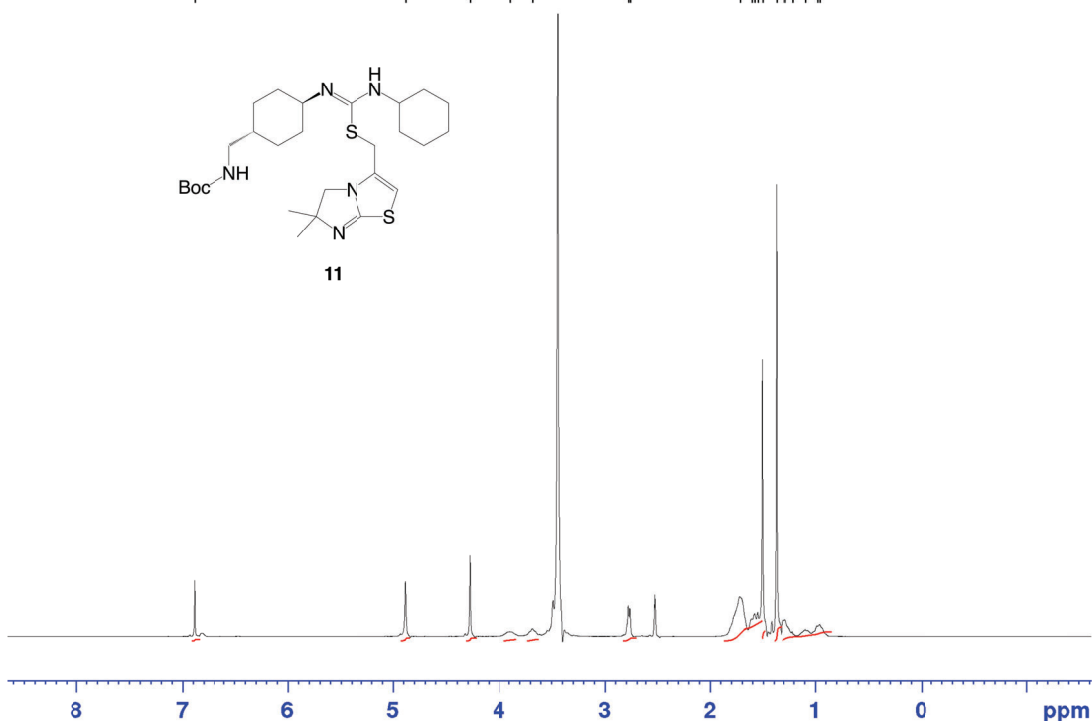

1.00  
 1.86  
 1.86  
 0.87  
 1.02  
 1.87  
 13.30  
 6.31  
 6.90  
 5.81

Mar.17,2015  
C13C2D DMSO /opt/topspin Kang.g 29

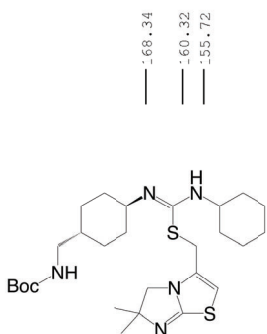

— .68.34  
— .60.32  
— .55.72  
  
— .31.36  
  
— .10.22

77.40  
69.29  
58.15  
56.30  
53.34  
45.61  
45.48  
40.08  
39.87  
38.67  
38.45  
38.23  
38.05  
38.02  
36.74  
32.07  
31.41  
30.96  
30.39  
28.51  
28.23  
28.04  
27.36  
24.51  
24.32

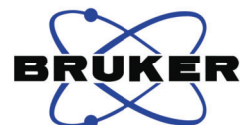

Current Data Parameters  
NAME GK-II-19b\_C  
EXPNO 10  
PROCNO 1

F2 - Acquisition Parameters  
Date\_ 20150319  
Time 1.54  
INSTRUM spect  
PROBHD 5 mm PABBO BB-  
PULPROG zgpg30  
TD 65536  
SOLVENT DMSO  
NS  
DS  
SWH  
FIDRES  
AQ

Apr.02,2015  
PROTON CDCl3 /opt/topspin Kang.g 59

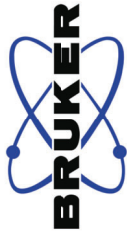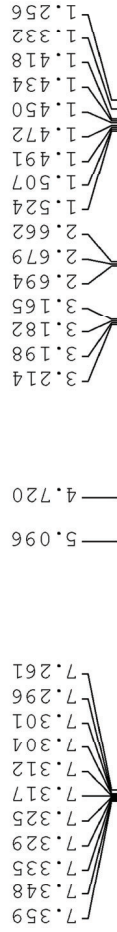

Current Data Parameters  
NAME GK-II-29  
EXPNO 10  
PROCNO 1

F2 - Acquisition Parameters  
Date\_ 20150402  
Time 16.54  
INSTRUM spect  
PROBHD 5 mm PABBO BB-  
PULPROG zg30  
TD 65336  
SOLVENT CDCl3  
NS 16  
DS 2  
SWH 8223.685 Hz  
FIDRES 0.125483 Hz  
AQ 3.9845889 sec  
RG 203  
DW 60.800 usec  
DE 6.50 usec  
TE 306.5 K  
D1 1.00000000 sec  
TD0 1

===== CHANNEL f1 =====  
NUC1 1H  
P1 12.00 usec  
PL 2.00 dB  
FLL 15.12607274 W  
SFO1 400.1324710 MHz

F2 - Processing parameters  
SI 32768  
SF 400.1300115 MHz  
WDW EM  
SSB 0  
LB 0.30 Hz  
GB 0  
PC 1.00

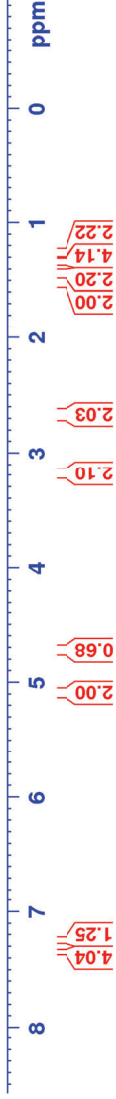

Apr.12,2015  
C13CPD CDCl3 /opt/topspin Kang.g 29

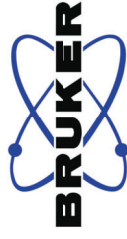

Current Data Parameters  
NAME GK-II-29\_C  
EXPNO 10  
PROCNO 1

F2 - Acquisition Parameters  
Date\_ 20150413  
Time 23.03  
INSTRUM spect  
PROBHD 5 mm PABBO BB-  
PULPROG zgpg30  
TD 65536  
SOLVENT CDCl3  
NS 5210  
DS 4  
SWH 24038.461 Hz  
FIDRES 0.366798 Hz  
AQ 1.3631488 sec  
RG 203  
DW 20.800 usec  
DE 6.50 usec  
TE 304.4 K  
D1 2.00000000 sec  
D11 0.03000000 sec  
TD0 1

===== CHANNEL f1 =====  
NUC1 13C  
P1 8.50 usec  
PL1 -1.70 dB  
PL1W 55.73028564 W  
SFO1 100.6228298 MHz

===== CHANNEL f2 =====  
CPDPRG2 waltz16  
NUC2 1H  
PCPD2 80.00 usec  
PL2 -2.00 dB  
PL2 14.50 dB  
PL3 14.50 dB  
PL2W 15.12807274 W  
PL12W 0.33867535 W  
PL13W 0.33867535 W  
SFO2 400.1316005 MHz

F2 - Processing Parameters  
SI 32768  
SF 100.6127655 MHz  
RGW 0  
SSB 0  
LB 0  
GB 0  
PC 1.40

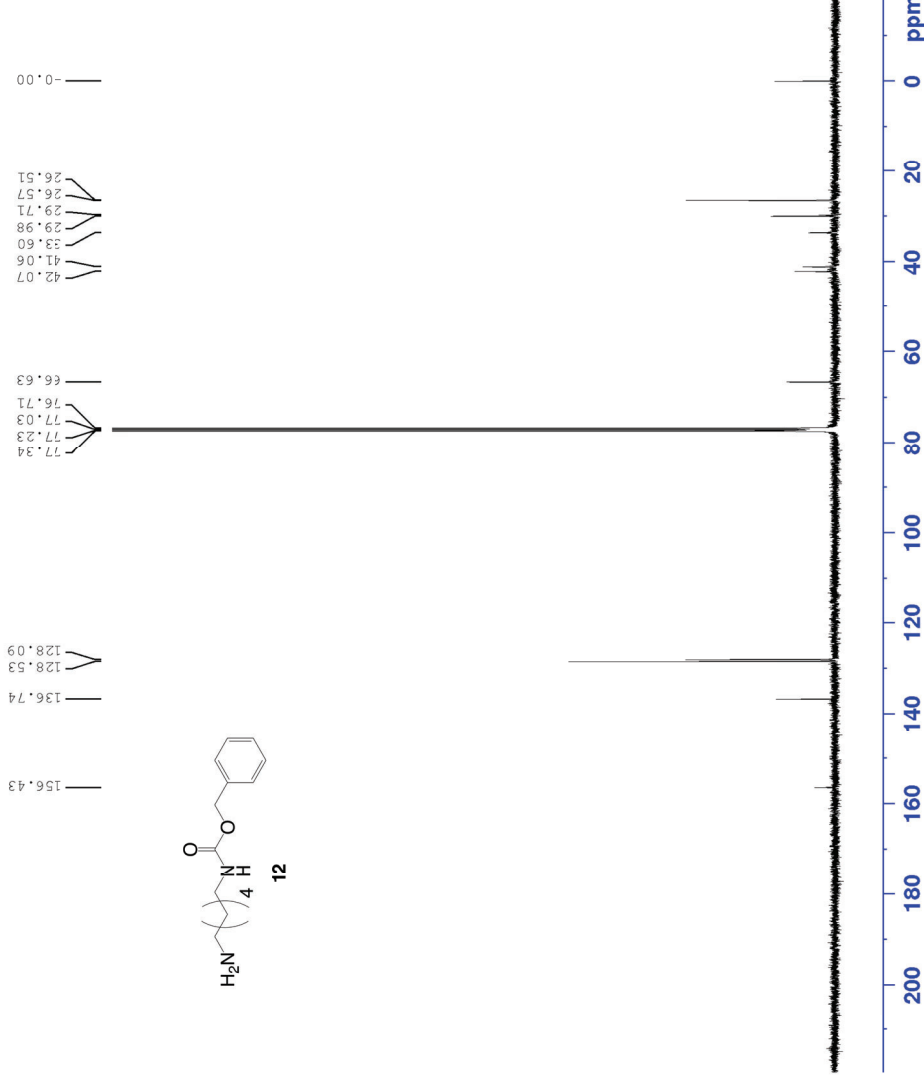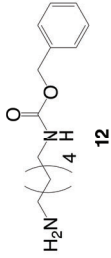

Apr.07, 2015  
PROTON DMSO /opt/topspin Kang.g 33

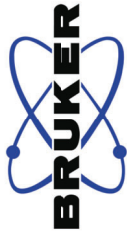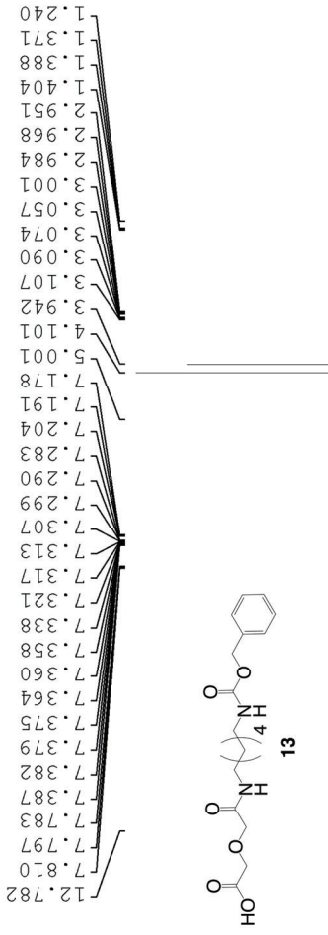

Current Data Parameters  
NAME GK-II-31  
EXPNO 10  
PROCNO 1

F2 - Acquisition Parameters  
Date\_ 20150407  
Time 17.27  
INSTRUM spect  
PROBHD 5 mm PABBO BB-  
PULPROG zg30  
TD 65536  
SOLVENT DMSO  
NS 8  
DS 2  
SWH 8223.685 H  
FIDRES 0.125483 H



Apr.07,2015  
C13CPD DMSO /opt/topspin Kang.g 33

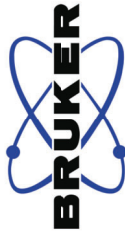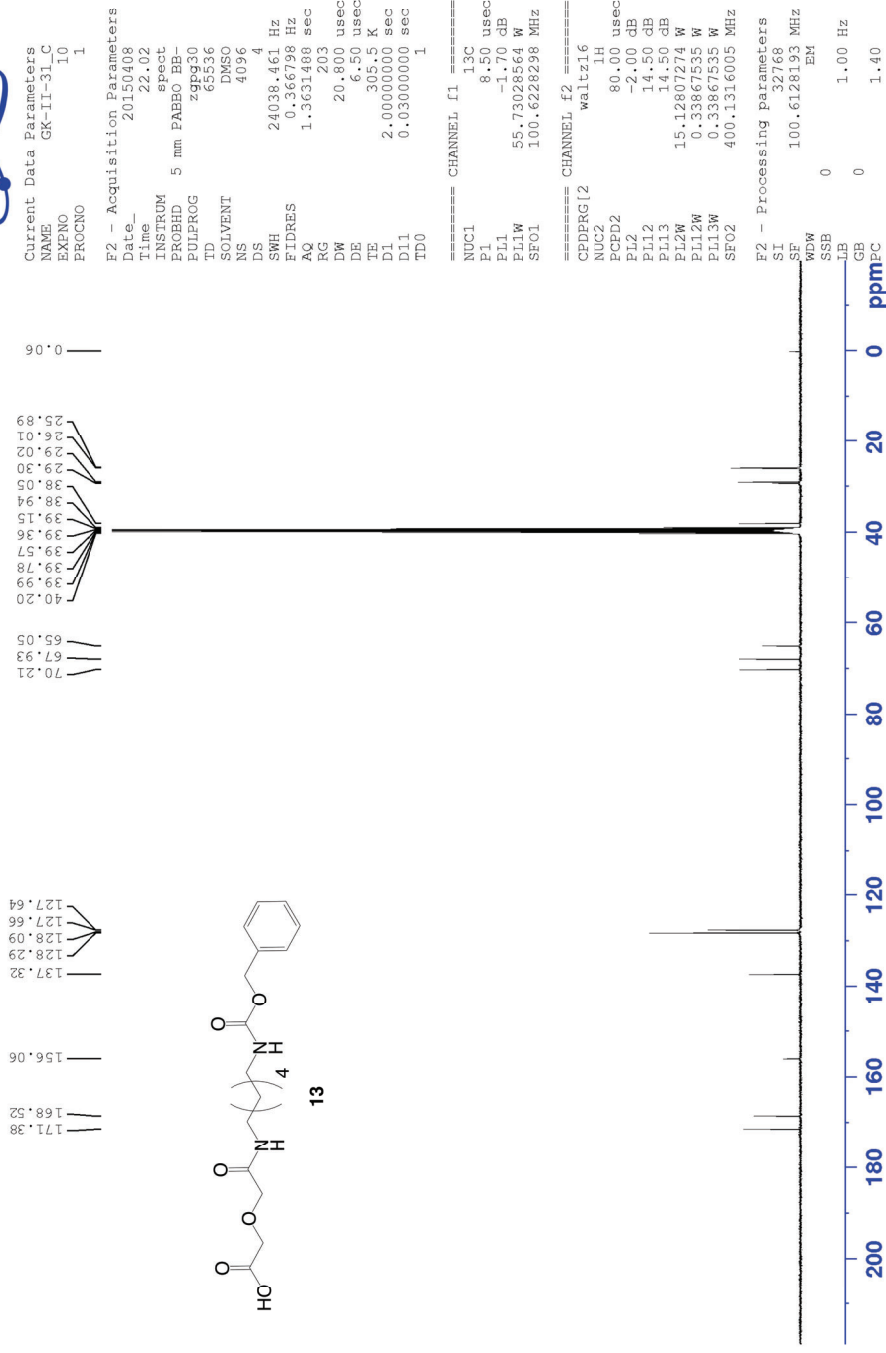

Apr.25, 2015  
 PROTON CDCl3 /opt/topspin Kang.g 58

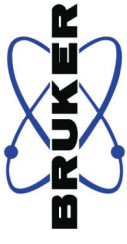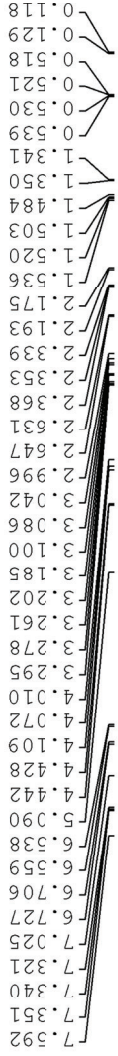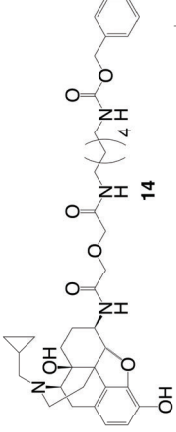

F2 - Acquisition Parameters  
 Date\_ 20150425  
 Time\_ 16.31  
 INSTRUM spect  
 PROBHD 5 mm PABBO BB-  
 PULPROG zg30  
 TD 65336  
 SOLVENT CDCl3  
 NS 16  
 DS 2  
 SWH 8223.685 Hz  
 FIDRES 0.125483 Hz  
 AQC 3.9845889 sec  
 RG 181  
 DW 60.800 usec  
 DE 6.50 usec  
 TE 298.4 K  
 D1 1.00000000 sec  
 TD0 1

===== CHANNEL f1 =====  
 NUC1 1H  
 P1 12.00 usec  
 PL 2.00 dB  
 FLL 15.12607274 W  
 SFO1 400.1324710 MHz

F2 - Processing parameters  
 SI 32768  
 SF 400.1300087 MHz  
 WDW EM  
 SSB 0  
 LB 0.30 Hz  
 GB 0  
 PC 1.00

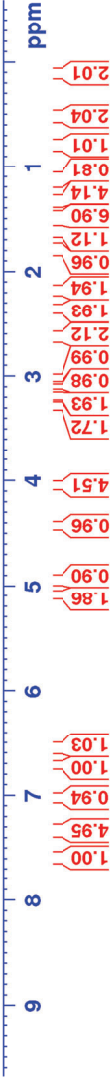

Apr.25,2015  
 C13CPD CDC13 /opt/topspin Kang.g 58

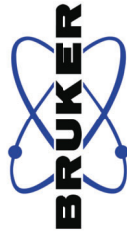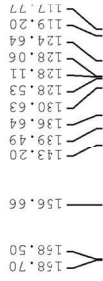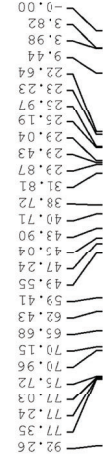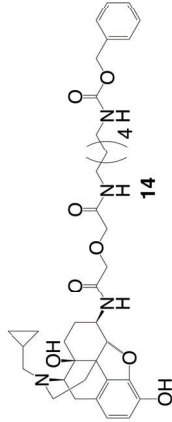

Current Data Parameters  
 NAME GR-II-34s\_C  
 EXPNO 10  
 PROCNO 1

F2 - Acquisition Parameters  
 Date\_ 20150426  
 Time 7.50  
 INSTRUM spect  
 PROBHD 5 mm PABBO BB-  
 PULPROG zgpg30  
 TD 65536  
 SOLVENT CDC13  
 NS 4096  
 DS 4  
 SWH 24038.461 Hz  
 FIDRES 0.366798 Hz  
 AQ 1.3631488 sec  
 RG 203  
 DW 20.800 usec  
 DE 6.50 usec  
 TE 302.1 K  
 D1 2.00000000 sec  
 D11 0.03000000 sec  
 TD0 1

===== CHANNEL f1 =====  
 NUC1 13C  
 P1 8.50 usec  
 PL1 -1.70 dB  
 PL1W 55.73028564 W  
 SFO1 100.6228298 MHz

===== CHANNEL f2 =====  
 CPDPRG[2] waltz16  
 NUC2 1H  
 PCPD2 80.00 usec  
 PL2 -2.00 dB  
 PL12 14.50 dB  
 PL13 14.50 dB  
 PL1W 15.12807274 W  
 PL12W 0.33867535 W  
 PL13W 0.33867535 W  
 SFO2 400.1316005 MHz

F2 - Processing parameters  
 SI 32768  
 SF 100.6127670 MHz  
 NCBW  
 SSB 0  
 LB 0 1.00 Hz  
 GB 0  
 PC 1.40

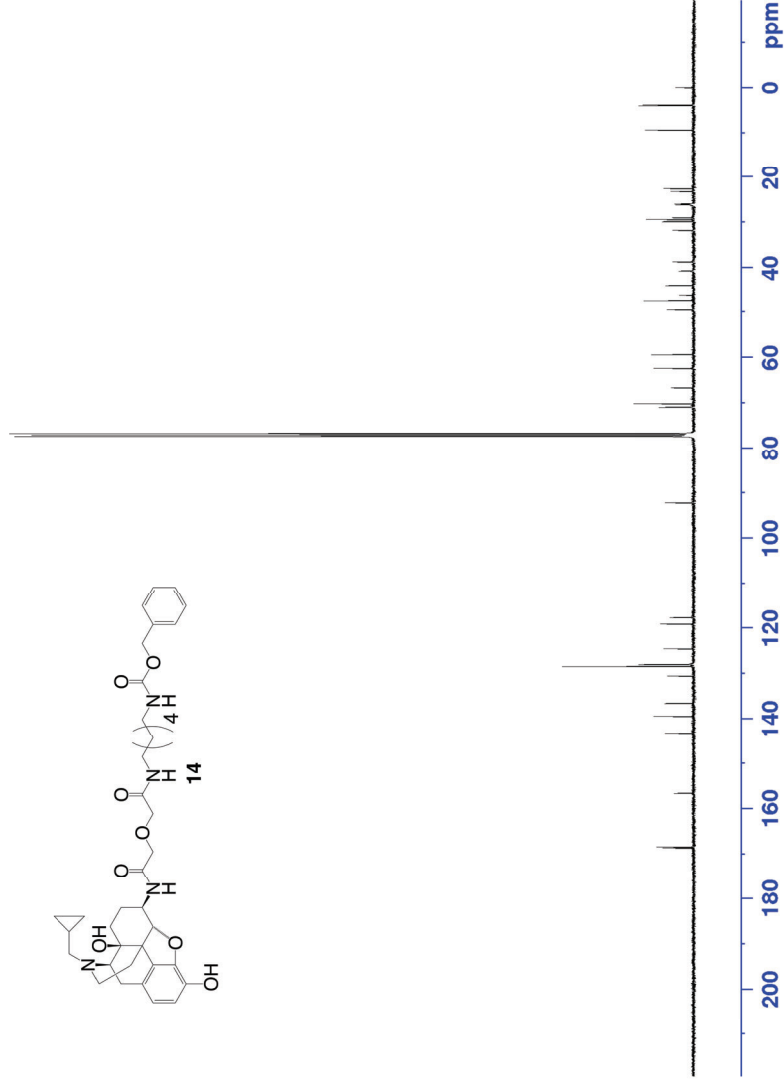

Apr.28,2015  
 PROTON DMSO /opt/topspin Kang.g 30

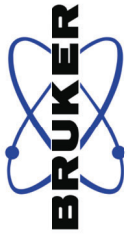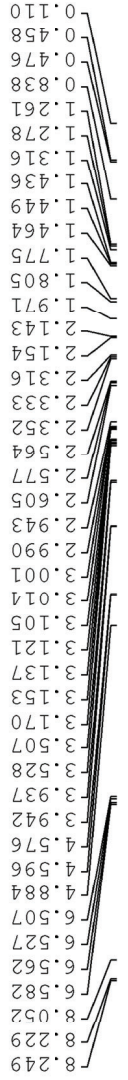

Current Data Parameters  
 NAME GK-II-40a  
 EXPNO 10  
 PROCNO 1

F2 - Acquisition Parameters  
 Date\_ 20150428  
 Time 9.06  
 INSTRUM spect  
 PROBHD 5 mm PABBO BB-  
 PULPROG zg30  
 TD 65336  
 SOLVENT DMSO  
 NS 16  
 DS 2  
 SWH 8223.685 Hz  
 FIDRES 0.125483 Hz  
 AQC 3.9845889 sec  
 RG 203  
 DW 60.800 usec  
 DE 6.50 usec  
 TE 299.6 K  
 D1 1.00000000 sec  
 TD0 1

===== CHANNEL f1 =====  
 NUC1 1H  
 P1 12.00 usec  
 PL -2.00 dB  
 FLL 15.12607274 W  
 SFO1 400.1324710 MHz

F2 - Processing parameters  
 SI 32768  
 SF 400.1300043 MHz  
 WDW EM  
 SSB 0  
 LB 0.30 Hz  
 GB 0  
 PC 1.00

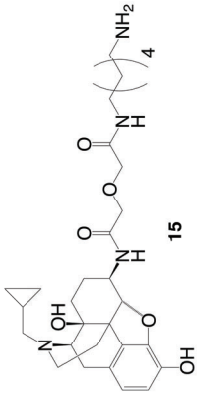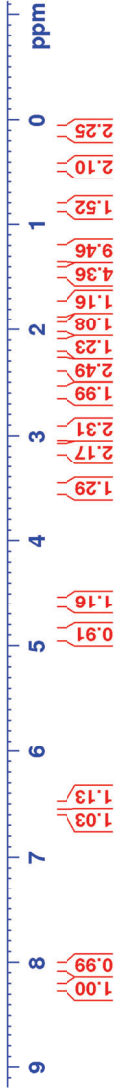

1.00  
 0.99  
 1.03  
 1.13  
 0.91  
 1.16  
 1.29  
 2.17  
 2.31  
 1.99  
 2.49  
 1.23  
 1.08  
 1.16  
 4.36  
 9.46  
 1.52  
 2.10  
 2.25

Apr.28,2015  
C13CPD DMSO /opt/topspin Kang.g 30

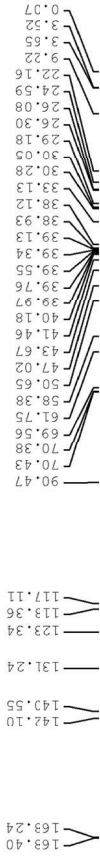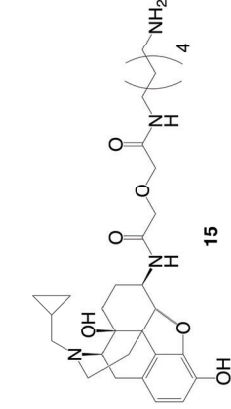

Current Data Parameters  
NAME GR-II-40s\_C  
EXPNO 10  
PROCNO 1

F2 - Acquisition Parameters  
Date\_ 20150429  
Time 7.51  
INSTRUM spect  
PROBHD 5 mm PABBO BB-  
PULPROG zgpg30  
TD 65536  
SOLVENT DMSO  
NS 10240  
DS 4  
SWH 24038.461 Hz  
FIDRES 0.366798 Hz  
AQ 1.3631488 sec  
RG 203  
DW 20.800 usec  
DE 6.50 usec  
TE 301.8 K  
D1 2.0000000 sec  
D11 0.0300000 sec  
TD0 1

===== CHANNEL f1 =====  
NUC1 13C  
P1 8.50 usec  
PL1 -1.70 dB  
PL1W 55.73028564 W  
SFO1 100.6228298 MHz

===== CHANNEL f2 =====  
CPDPRG2 waltz16  
NUC2 1H  
PCPD2 80.00 usec  
PL2 -2.00 dB  
PL2 14.50 dB  
PL13 14.50 dB  
PL12W 15.12807274 W  
PL12M 0.33867535 W  
PL13W 0.33867535 W  
SFO2 400.1316005 MHz

F2 - Processing parameters  
SI 32768  
SF 100.6128193 MHz  
WDW EM  
SSB 0  
GB 0  
PC 1.00 Hz  
PR 1.40

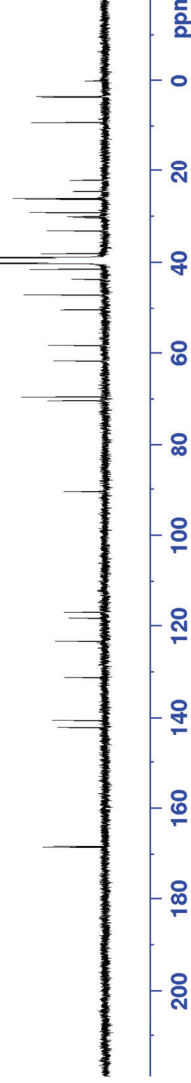

May 08, 2015  
 PROTON DMSO /opt/topspin Kang.g 37

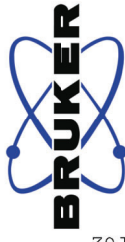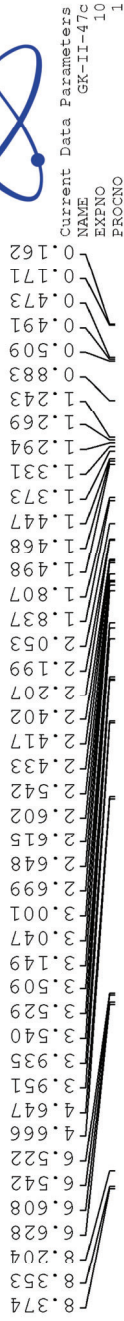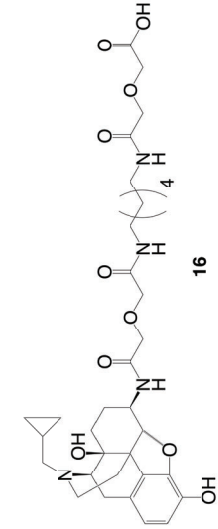

F2 - Acquisition Parameters  
 Date\_ 20150508  
 Time\_ 15.27  
 INSTRUM spect  
 PROBHD 5 mm PABBO BB-  
 PULPROG zg30  
 TD 65336  
 SOLVENT DMSO  
 NS 16  
 DS 2  
 SWH 8223.685 Hz  
 FIDRES 0.125483 Hz  
 AQ 3.9845889 sec  
 RG 203  
 DW 60.800 usec  
 DE 6.50 usec  
 TE 301.0 K  
 D1 1.00000000 sec  
 TD0 1

===== CHANNEL f1 =====  
 NUC1 1H  
 P1 12.00 usec  
 PL -2.00 dB  
 FLL 15.12807274 W  
 SFO1 400.1324710 MHz

F2 - Processing parameters  
 SI 32768  
 SF 400.1300041 MHz  
 WDW EM  
 SSB 0  
 LB 0.30 Hz  
 GB 0  
 PC 1.00

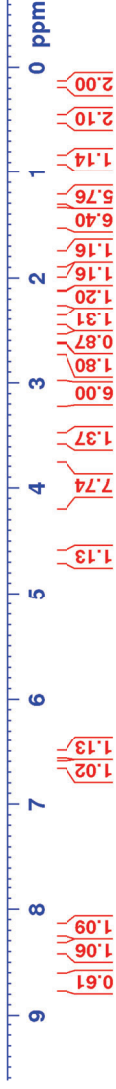

May 07, 2015  
 C13CPD DMSO /opt/topspin Kang.g 37



169.15  
 147.02  
 147.59  
 133.95  
 122.82  
 118.95  
 117.11  
 90.29  
 70.32  
 70.29  
 69.49  
 61.69  
 58.08  
 50.53  
 46.73  
 43.97  
 38.17  
 37.93  
 29.93  
 29.73  
 28.91  
 28.85  
 25.87  
 25.84  
 24.36  
 22.23  
 22.23  
 8.59  
 3.72  
 3.35

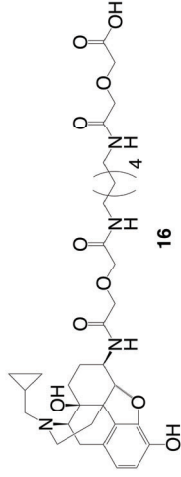

Current Data Parameters  
 NAME GR-II-47B\_C  
 EXPNO 10  
 PROCNO 1

F2 - Acquisition Parameters  
 Date\_ 20150508  
 Time 6.43  
 INSTRUM spect  
 PROBHD 5 mm PABBO BB-  
 PULPROG zgpg30  
 TD 65536  
 SOLVENT DMSO  
 NS 8192  
 DS 4  
 SWH 24038.461 Hz  
 FIDRES 0.366798 Hz  
 AQ 1.3631488 sec  
 RG 203  
 DW 20.800 usec  
 DE 6.50 usec  
 TE 302.8 K  
 D1 2.00000000 sec  
 D11 0.03000000 sec  
 TD0 1

===== CHANNEL f1 =====  
 NUC1 13C  
 P1 8.50 usec  
 PL1 -1.70 dB  
 PL1W 55.73028564 W  
 SFO1 100.6228298 MHz

===== CHANNEL f2 =====  
 CPDPRG[2] waltz16  
 NUC2 1H  
 PCPD2 80.00 usec  
 PL2 -2.00 dB  
 PL2 14.50 dB  
 PL13 14.50 dB  
 PL2W 15.12807274 W  
 PL12W 0.33867535 W  
 PL13W 0.33867535 W  
 SFO2 400.1316005 MHz

F2 - Processing Parameters  
 SI 32768  
 SF 100.6128279 MHz  
 SSB 0  
 GB 0  
 PC 1.40

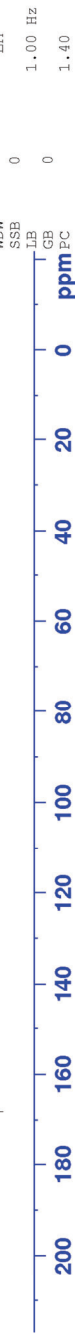

Jun 10, 2015  
PROTON DMSO /opt/topspin Kang.g 1

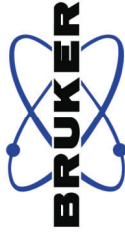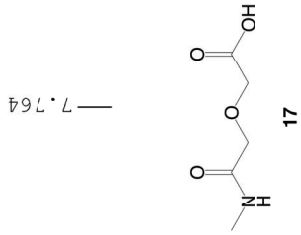

7.764  
4.096  
3.941  
2.630  
2.619

Current Data Parameters  
NAME GK-II-54a  
EXPNO 10  
PROCNO 1

F2 - Acquisition Parameters  
Date\_ 20150610  
Time 17.09  
INSTRUM spect  
PROBHD 5 mm PABBO BB-  
PULPROG zg30  
TD 6536  
SOLVENT DMSO  
NS 8  
DS 2  
SWH 8223.685 Hz  
FIDRES 0.125483 Hz  
AQ 3.9845889 sec  
RG 181  
DW 60.800 usec  
DE 6.50 usec  
TE 302.4 K  
D1 1.00000000 sec  
TD0 1

===== CHANNEL f1 =====  
NUC1 1H  
P1 12.00 usec  
PL -2.00 dB  
FL1 15.12607274 W  
SFO1 400.1324710 MHz

F2 - Processing parameters  
SI 32768  
SF 400.1300039 MHz  
WDW EM  
SSB 0  
LB 0.30 Hz  
GB 0  
PC 1.00

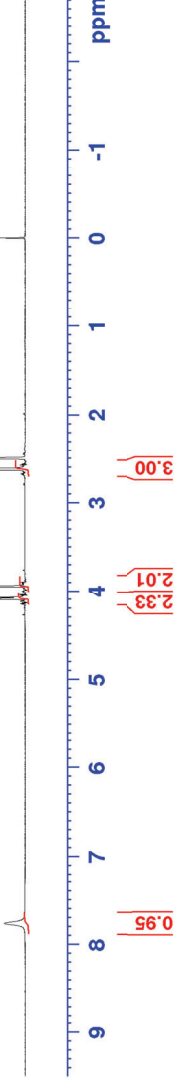



Jun 10, 2015  
C13CPD DMSO /opt/topspin Kang.g 1

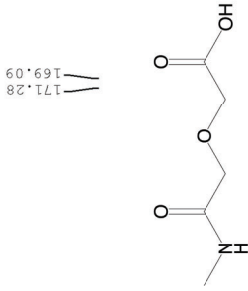

17

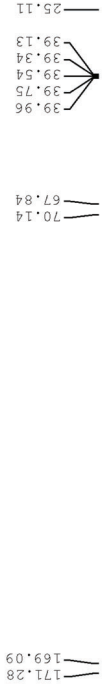

Current Data Parameters  
NAME GR-II-54a\_C  
EXPNO 10  
PROCNO 1

F2 - Acquisition Parameters  
Date\_ 20150611  
Time 1.52  
INSTRUM spect  
PROBHD 5 mm PABBO BB-  
PULPROG zgpg30  
TD 65536  
SOLVENT DMSO  
NS 4096  
DS 4  
SWH 24038.461 Hz  
FIDRES 0.366798 Hz  
AQ 1.3631488 sec  
RG 203  
DW 20.800 usec  
DE 6.50 usec  
TE 304.2 K  
D1 2.00000000 sec  
D11 0.03000000 sec  
TD0 1

==== CHANNEL f1 =====  
NUC1 13C  
P1 8.50 usec  
PL1 -1.70 dB  
PL1W 55.73028564 W  
SFO1 100.6228298 MHz

==== CHANNEL f2 =====  
CPDPRG2 waltz16  
NUC2 1H  
PCPD2 80.00 usec  
PL2 -2.00 dB  
PL2W 14.50 dB  
PL13 14.50 dB  
PL12W 15.12807274 W  
PL12W 0.33867535 W  
PL13W 0.33867535 W  
SFO2 400.1316005 MHz

F2 - Processing parameters  
SI 32768  
SF 100.6128193 MHz  
WDW EM  
SSB 0  
GB 0  
PC 1.40

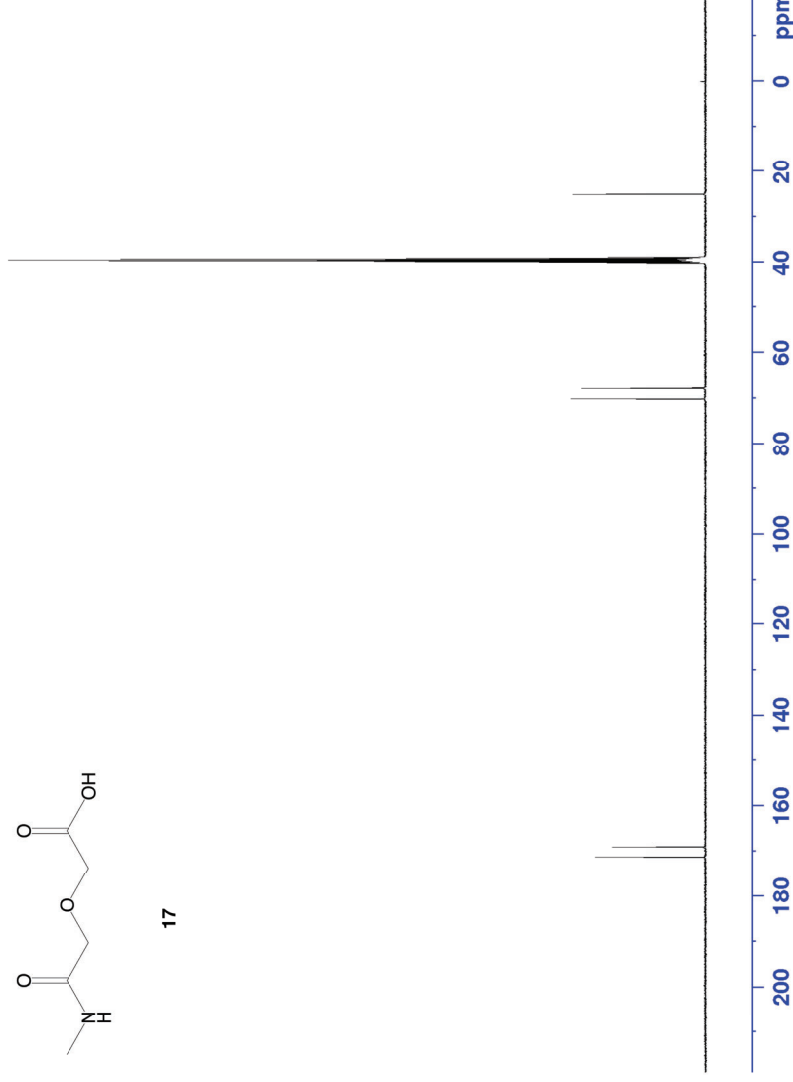

Jun 22, 2015  
 PROTON DMSO /opt/topspin Kang.g 17

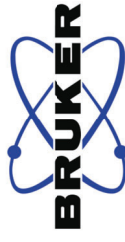

7.986  
 7.972  
 7.957  
 7.343  
 7.338  
 7.203  
 7.190  
 7.177  
 5.002  
 3.908  
 3.126  
 3.110  
 3.093  
 3.076  
 3.004  
 2.987  
 2.971  
 2.955  
 2.657  
 2.645  
 2.503  
 2.499  
 2.494  
 1.410  
 1.402  
 1.394  
 1.376  
 1.250

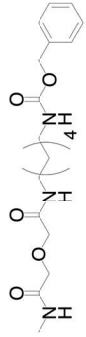

Current Data Parameters  
 NAME GK-II-57b  
 EXPNO 10  
 PROCNO 1

F2 - Acquisition Parameters  
 Date\_ 20150622  
 Time\_ 14.54  
 INSTRUM spect  
 PROBHD 5 mm PABBO BB-  
 PULPROG zg30  
 TD 65336  
 SOLVENT DMSO  
 NS 8  
 DS 2  
 SWH 8223.685 Hz  
 FIDRES 0.125483 Hz  
 AQ 3.9845889 sec  
 RG 161  
 DW 60.800 usec  
 DE 6.50 usec  
 TE 304.9 K  
 D1 1.00000000 sec  
 TD0 1

===== CHANNEL f1 =====  
 NUC1 1H  
 P1 12.00 usec  
 PL -2.00 dB  
 FLL 15.12607274 W  
 SFO1 400.1324710 MHz

F2 - Processing parameters  
 SI 32768  
 SF 400.1300055 MHz  
 WDW EM  
 SSB 0  
 LB 0.30 Hz  
 GB 0  
 PC 1.00

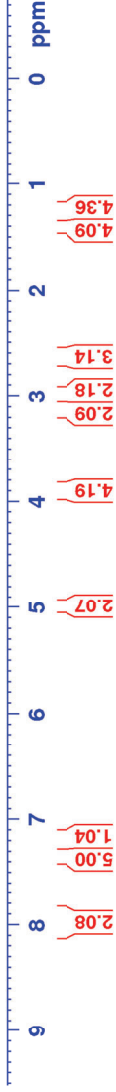

Jun.22,2015  
 C13CPD DMSO /opt/topspin Kang.g 17

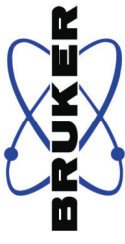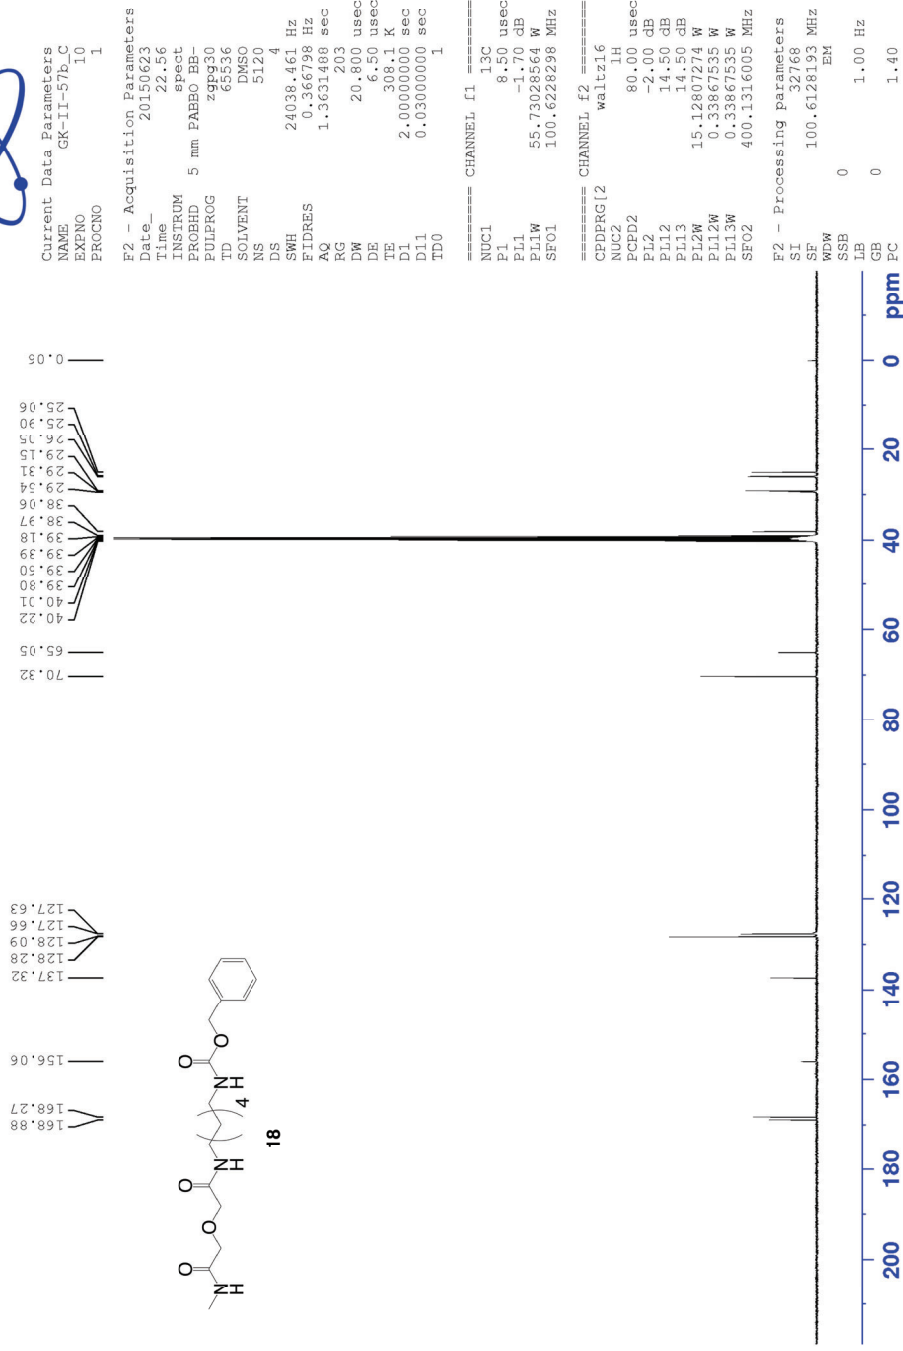

Jun.25,2015  
PROTON DMSO /opt/topspin Kang.g 22

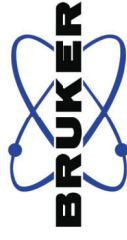

8.000  
7.987

3.908  
3.906  
3.132  
3.115  
3.098  
3.081  
2.658  
2.646  
2.541  
2.526  
1.465  
1.447  
1.430  
1.413  
1.395  
1.358  
1.343  
1.327  
1.310  
1.266  
1.257  
1.200

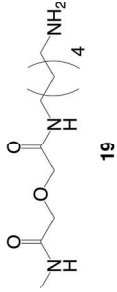

Current Data Parameters  
NAME GK-II-62  
EXPNO 10  
PROCNO 1

F2 - Acquisition Parameters  
Date\_ 20150625  
Time 17.26  
INSTRUM spect  
PROBHD 5 mm PABBO BB-  
PULPROG zg30  
TD 65336  
SOLVENT DMSO  
NS 16  
DS 2  
SWH 8223.685 Hz  
FIDRES 0.125483 Hz  
AQ 3.9845889 sec  
RG 161  
DW 60.800 usec  
DE 6.50 usec  
TE 304.4 K  
D1 1.00000000 sec  
TD0 1

===== CHANNEL f1 =====  
NUC1 1H  
P1 12.00 usec  
PL 2.00 dB  
FL1 15.12607274 W  
SFO1 400.1324710 MHz

F2 - Processing parameters  
SI 32768  
SF 400.1300047 MHz  
WDW EM  
SSB 0  
LB 0.30 Hz  
GB 0  
PC 1.00

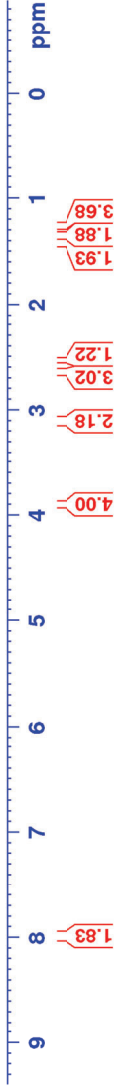

Jun.25,2015  
C13CPD DMSO /opt/topspin Kang.g 22



168.26  
168.87  
168.87

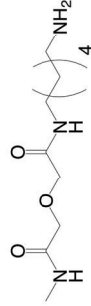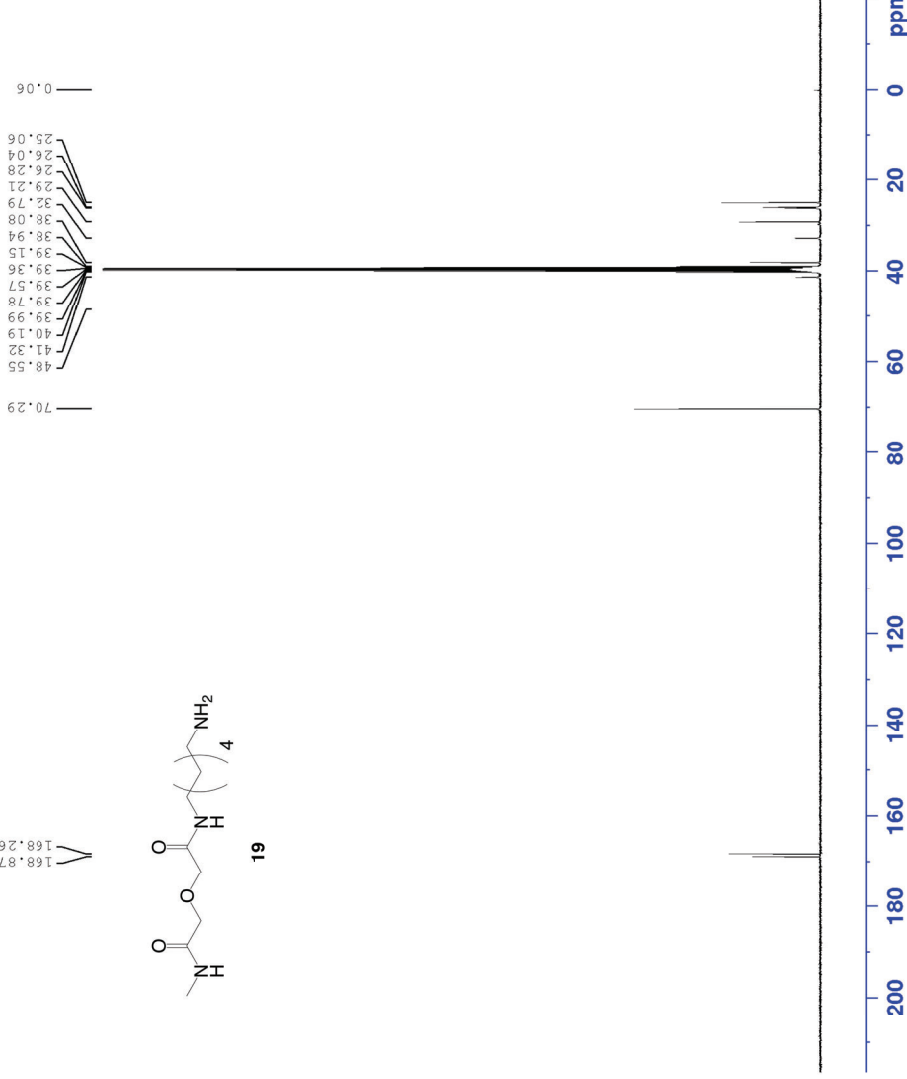

Current Data Parameters  
NAME GK-11-62  
EXPNO 20  
PROCNO 1

F2 - Acquisition Parameters  
Date\_ 20150626  
Time 7.53  
INSTRUM spect  
PROBHD 5 mm PABBO BB-  
PULPROG zgpg30  
TD 65536  
SOLVENT DMSO  
NS 7168  
DS 4  
SWH 24038.461 Hz  
FIDRES 0.366798 Hz  
AQ 1.3631488 sec  
RG 203  
DW 20.800 usec  
DE 6.50 usec  
TE 304.8 K  
D1 2.00000000 sec  
D11 0.03000000 sec  
TD0 1

===== CHANNEL f1 =====  
NUC1 13C  
P1 8.50 usec  
PL1 -1.70 dB  
PL1W 55.73028564 W  
SFO1 100.6228298 MHz

===== CHANNEL f2 =====  
CPDPRG2 waltz16  
NUC2 1H  
PCPD2 80.00 usec  
PL2 -2.00 dB  
PL2 14.50 dB  
PL13 14.50 dB  
PL2W 15.12807274 W  
PL12W 0.33867535 W  
PL13W 0.33867535 W  
SFO2 400.1316005 MHz

F2 - Processing parameters  
SI 32768  
SF 100.6128193 MHz  
RGW 0  
SSB 0  
LB 0  
GB 0  
PC 1.40

Jul.01,2015  
PROTON DMSO /opt/topspin Kang.g 33

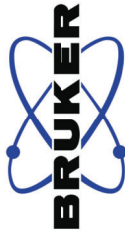

Current Data Parameters  
NAME GK-II-63  
EXPNO 10  
PROCNO 1

F2 - Acquisition Parameters  
Date\_ 20150701  
Time 17.18  
INSTRUM spect  
PROBHD 5 mm PABBO BB-  
PULPROG zg30  
TD 6536  
SOLVENT DMSO  
NS 16  
DS 2  
SWH 8223.685 Hz  
FIDRES 0.125483 Hz  
AQ 3.9845889 sec  
RG 161  
DW 60.800 usec  
DE 6.50 usec  
TE 304.0 K  
D1 1.00000000 sec  
TD0 1

===== CHANNEL f1 =====  
NUC1 1H  
P1 12.00 usec  
PL 2.00 dB  
FL1 15.12607274 W  
SFO1 400.1324710 MHz

F2 - Processing parameters  
SI 32768  
SF 400.1300047 MHz  
WDW EM  
SSB 0  
LB 0.30 Hz  
GB 0  
PC 1.00

7.969  
7.956  
7.823  
7.808  
7.794

4.100  
3.943  
3.907  
3.131  
3.115  
3.098  
3.082  
3.066  
2.658  
2.646

1.428  
1.417  
1.274  
1.257

2.00  
2.05  
4.11  
1.91  
4.18  
3.09  
4.06  
4.11

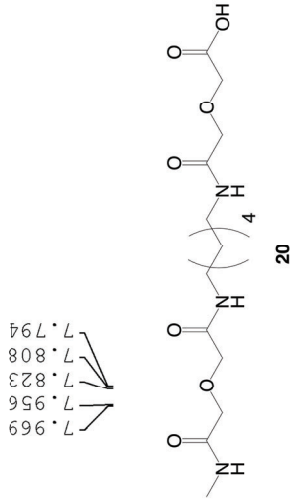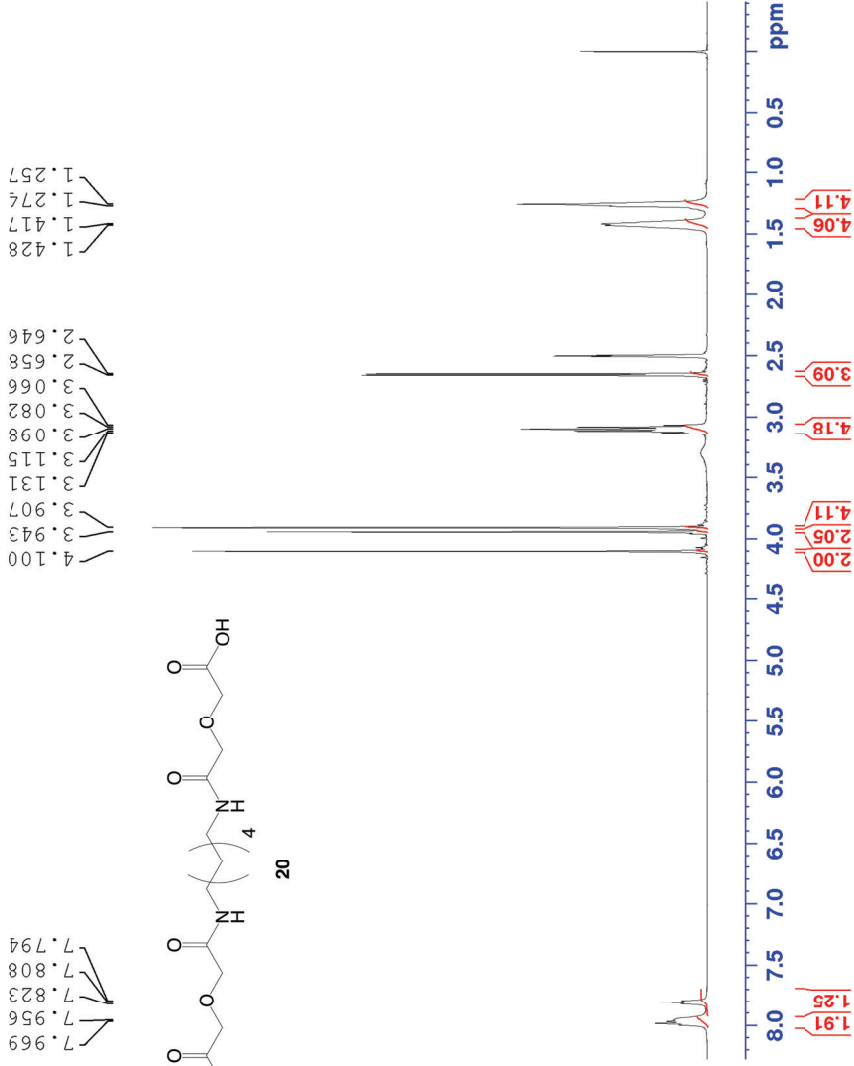

Jul.1.,2015  
C13CPD DMSO /opt/topspin Kang.g 33



Current Data Parameters  
NAME GK-II-63\_C  
EXPNO 10  
PROCNO 1

F2 - Acquisition Parameters  
Date\_ 20150702  
Time 1.51  
INSTRUM spect  
PROBHD 5 mm PABBO BB-  
PULPROG zgpg30  
TD 65536  
SOLVENT DMSO  
NS 8192  
DS 4  
SWH 24038.461 Hz  
FIDRES 0.366798 Hz  
AQ 1.3631488 sec  
RG 203  
DW 20.800 usec  
DE 6.50 usec  
TE 308.5 K  
D1 2.0000000 sec  
D11 0.0300000 sec  
TD0 1

===== CHANNEL f1 =====  
NUC1 13C  
P1 8.50 usec  
PL1 -1.70 dB  
PL1W 55.73028564 W  
SFO1 100.6228298 MHz

===== CHANNEL f2 =====  
CPDPRG[2] waltz16  
NUC2 1H  
PCPD2 80.00 usec  
PL2 -2.00 dB  
PL2 14.50 dB  
PL13 14.50 dB  
PL2W 15.12807274 W  
PL12W 0.33867535 W  
PL13W 0.33867535 W  
SFO2 400.1316005 MHz

F2 - Processing parameters  
SI 32768  
SF 100.6128256 MHz  
RGW 0  
SSB 0  
LB 0  
GB 0  
PC 1.40

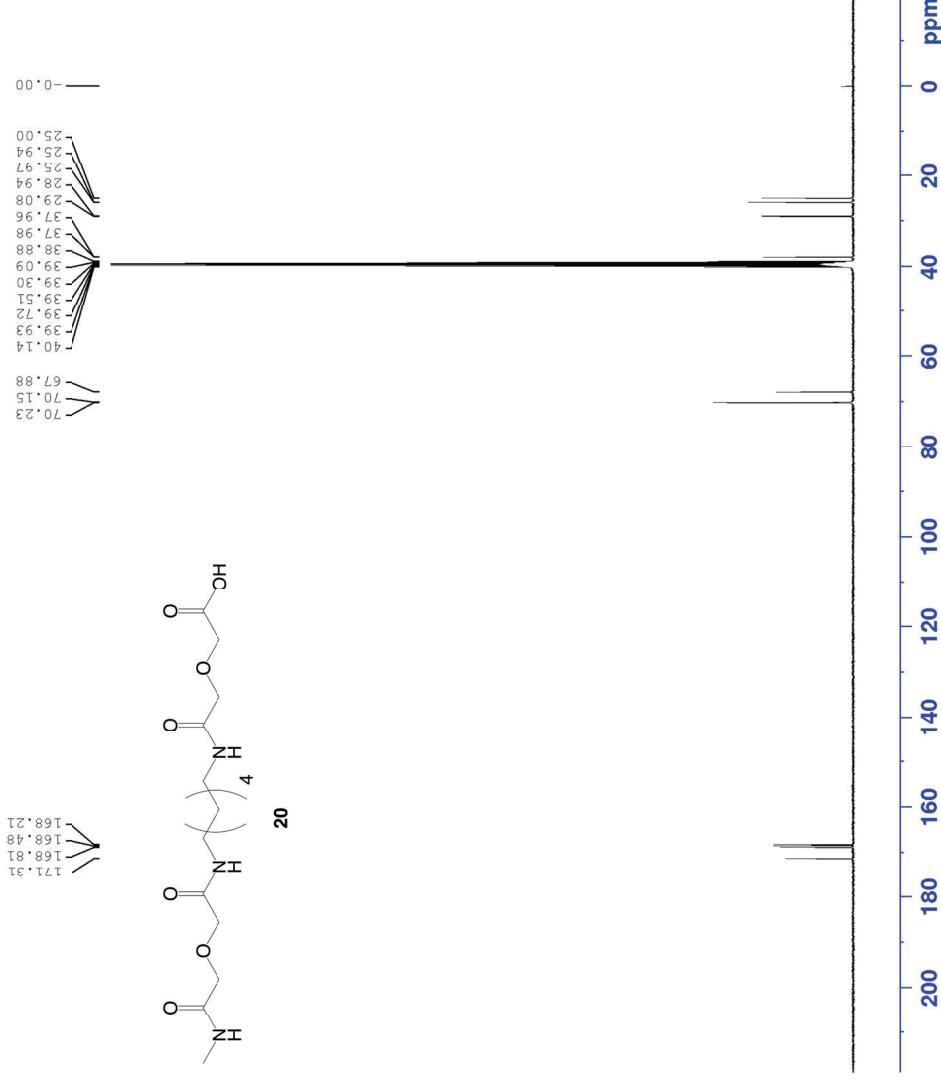

Mar.22,2015  
PROTON DMSO /opt/topspin Kang.g 15

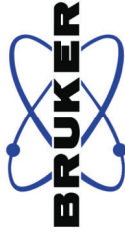

Current Data Parameters  
NAME GK-II-25b  
EXPNO 10  
PROCNO 1

F2 - Acquisition Parameters  
Date\_ 20150322  
Time 13.06  
INSTRUM spect  
PROBHD 5 mm PABBO BB-  
PULPROG zg30  
TD 65536  
SOLVENT DMSO  
NS 16  
DS 2  
SWH 8223.685 Hz  
FIDRES 0.125483 Hz  
AQ 3.9845889 sec  
RG 203  
DW 60.800 usec  
DE 6.50 usec  
TE 303.3 K  
D1 1.00000000 sec  
TD0 1

===== CHANNEL f1 =====  
NUC1 1H  
P1 12.00 usec  
PL1 -2.00 dB  
FL1 15.12807274 W  
SFO1 400.1324710 MHz

F2 - Processing parameters  
SI 32768  
SF 400.1300000 MHz  
WDW EM  
SSB 0  
LB 0.30 Hz  
GB 0  
PC 1.00

10.570  
10.444  
10.399  
9.530  
9.521  
9.377  
9.210  
9.186  
7.920  
7.220  
6.863  
4.680  
4.229  
3.886  
3.793  
3.740  
3.709  
3.646  
2.675  
1.848  
1.816  
1.746  
1.675  
1.631  
1.600  
1.516  
1.419  
1.388  
1.371  
1.354  
1.326  
1.293  
1.263  
1.047  
1.017

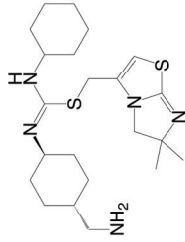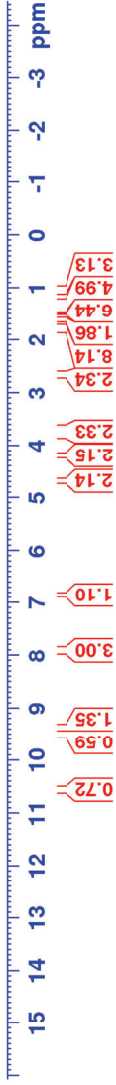



Mar.22,2015  
C13CPD DMSO /opt/topspin Kang.g 45



Current Data Parameters  
NAME GR-II-256\_C  
EXPNO 10  
PROCNO 1

F2 - Acquisition Parameters  
Date\_ 20150324  
Time 1.52  
INSTRUM spect  
PROBHD 5 mm PABBO BB-  
PULPROG zgpg30  
TD 65536  
SOLVENT DMSO  
NS 8192  
DS 4  
SWH 24038.461 Hz  
FIDRES 0.366798 Hz  
AQ 1.3631488 sec  
RG 203  
DW 20.800 usec  
DE 6.50 usec  
TE 304.2 K  
D1 2.0000000 sec  
D11 0.03000000 sec  
TD0 1

===== CHANNEL f1 =====  
NUC1 13C  
P1 8.50 usec  
PL1 -1.70 dB  
PL1W 55.73028564 W  
SFO1 100.6228298 MHz  
===== CHANNEL f2 =====  
CPDPRG[2] waltz16  
NUC2 1H  
PCPD2 80.00 usec  
PL2 -2.00 dB  
PL2 14.50 dB  
PL13 14.50 dB  
PL2W 15.12807274 W  
PL12W 0.33867535 W  
PL13W 0.33867535 W  
SFO2 400.1316005 MHz  
F2 - Processing parameters  
SI 32768  
SF 100.6128193 MHz  
WDW EM  
SSB 0  
GB 0  
PC 1.00 Hz  
LB 0  
PC 1.40

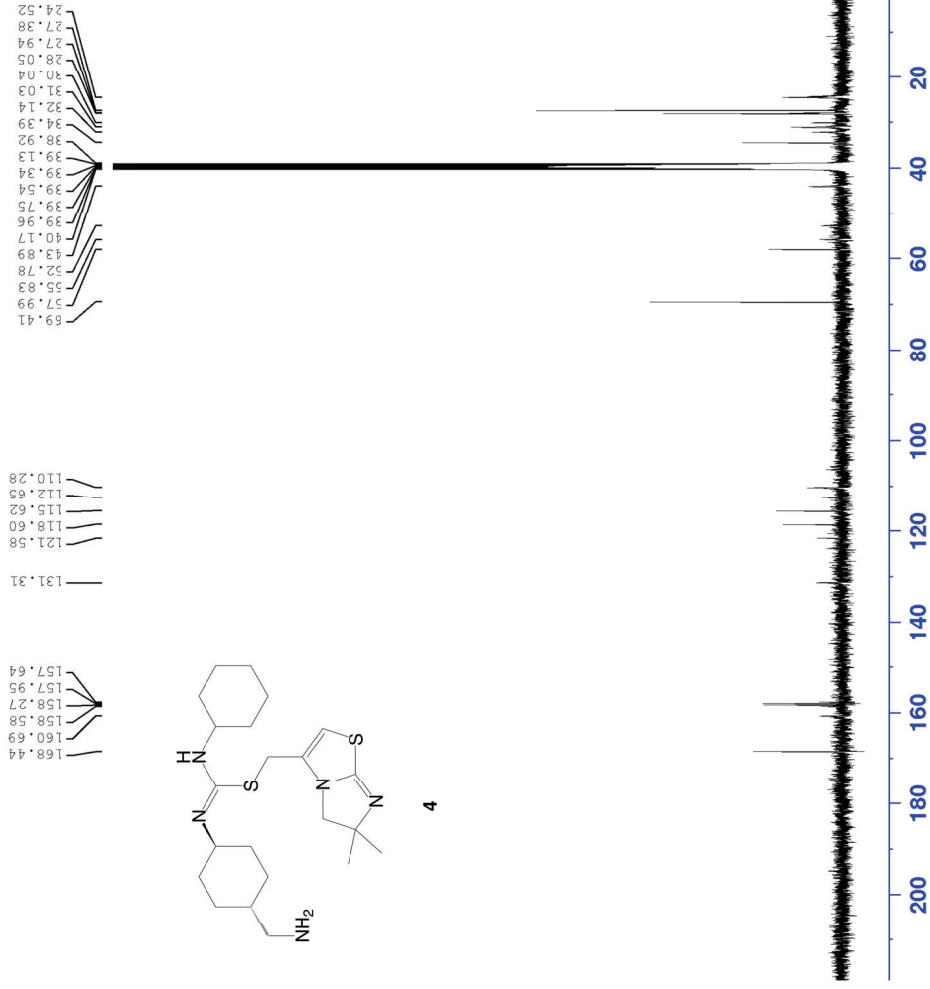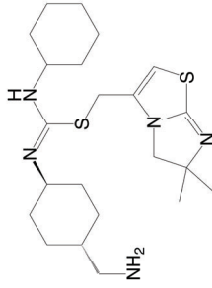

May 26, 2015  
 PROTON DMSO /opt/topspin Kang.g 50

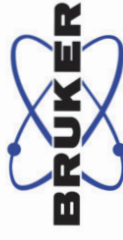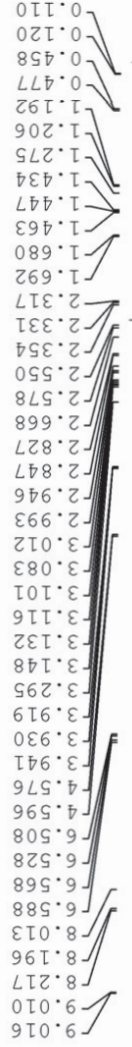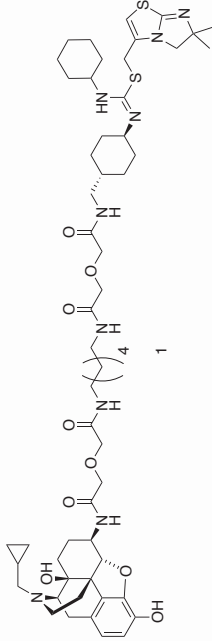

Current Data Parameters  
 NAME GK-II-50e  
 EXPNO 10  
 PROCNO 1

F2 - Acquisition Parameters  
 Date\_ 20150526  
 Time\_ 9.17  
 INSTRUM spect  
 PROBHD 5 mm PABBO BB-  
 PULPROG zg30  
 ID 65536  
 SOLVENT DMSO  
 NS 128  
 DS 2  
 SWH 8223.685 Hz  
 FIDRES 0.125483 Hz  
 AQ 3.9845889 sec  
 RG 203  
 DW 60.800 usec  
 DE 6.50 usec  
 TE 302.2 K  
 D1 1.00000000 sec  
 TD0 1

===== CHANNEL f1 =====  
 NUC1 1H  
 P1 12.00 usec  
 PL1 -2.00 dB  
 FLLW 15.12807274 W  
 SF01 400.1324710 MHz

F2 - Processing parameters  
 SI 32768  
 SF 400.1300050 MHz  
 WDW EM  
 SSB 0  
 LB 0.30 Hz  
 GB 0  
 PC 1.00

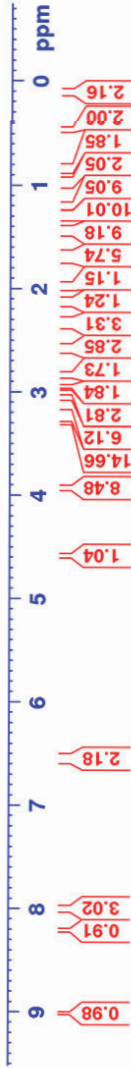

May 14, 2015  
 C13CPD DMSO /opt/topspin Kang.g 10

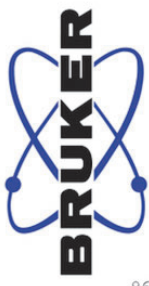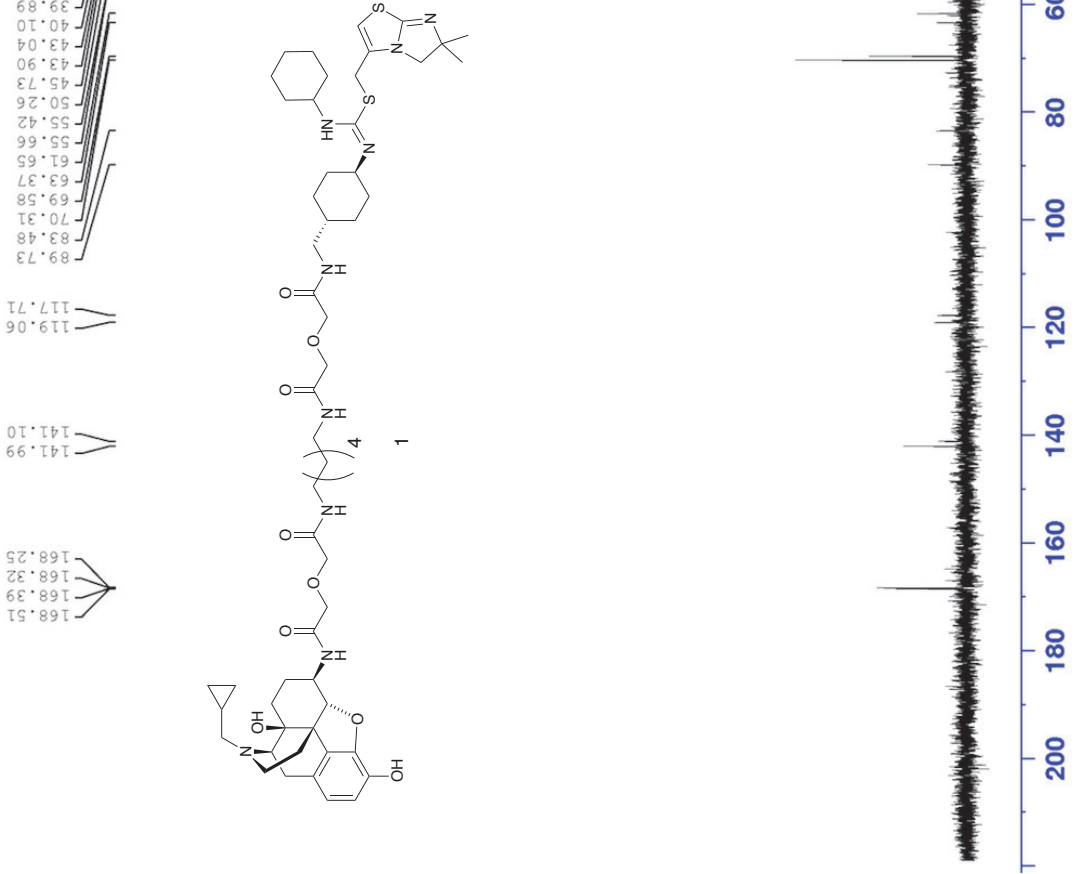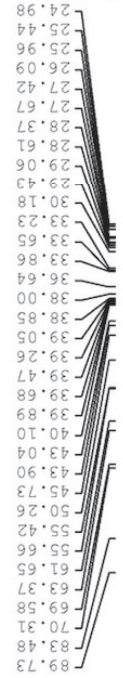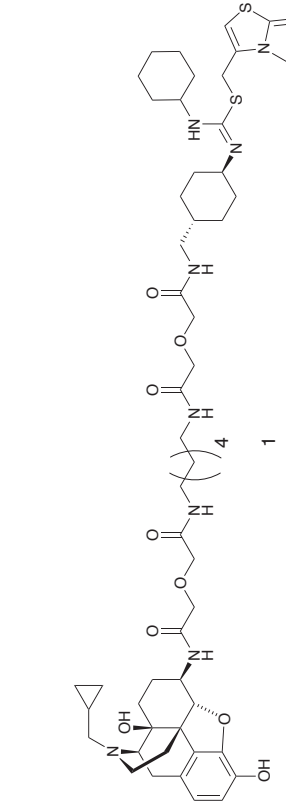

F2 - Acquisition Parameters  
 Date\_ 20150516  
 Time\_ 1.51  
 INSTRUM spect  
 PROBHD 5 mm PABBO BB-  
 PULPROG zgpg30  
 TD 65536  
 SOLVENT DMSO  
 NS 8192  
 DS 4  
 SWH 24038.461 Hz  
 FIDRES 0.366798 Hz  
 AQ 1.3631488 sec  
 RG 203  
 DW 20.800 usec  
 DE 6.50 usec  
 TE 301.7 K  
 D1 2.0000000 sec  
 D11 0.0300000 sec  
 TDO 1

==== CHANNEL f1 =====  
 NUC1 13C  
 P1 8.50 usec  
 PL1 -1.70 dB  
 PL1W 55.73028564 W  
 SF01 100.6228298 MHz

==== CHANNEL f2 =====  
 CPDPRG[2] waltz16  
 NUC2 1H  
 PCPD2 80.00 usec  
 PL2 -2.00 dB  
 PL2 14.50 dB  
 PL3 14.50 dB  
 PL2W 15.12807274 W  
 PL12W 0.33867535 W  
 PL13W 0.33867535 W  
 SFO2 400.1316005 MHz

F2 - Processing parameters  
 SI 32768  
 SF 100.6128271 MHz  
 EM  
 SSB 0  
 GB 0  
 LB 1.00 Hz  
 PC 1.40

Aug.23, 2015  
 PROTON DMSO /opt/topspin Kang.g 2

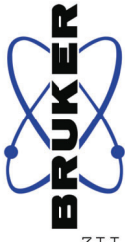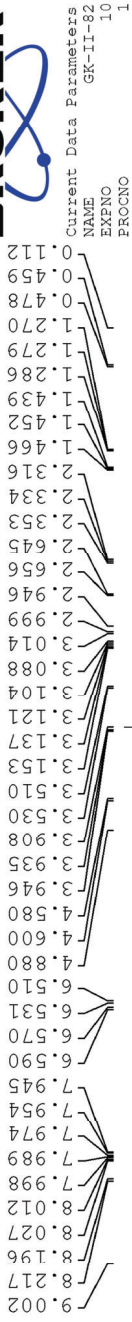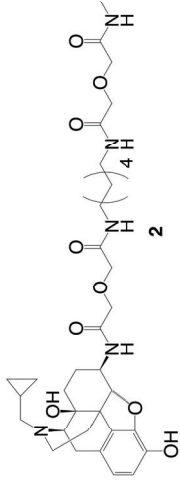

F2 - Acquisition Parameters  
 Date\_ 20150823  
 Time\_ 16.37  
 INSTRUM spect  
 PROBD 5 mm PABBO BB-  
 PULPROG zg30  
 TD 65336  
 SOLVENT DMSO  
 NS 16  
 DS 2  
 SWH 8223.685 Hz  
 FIDRES 0.125483 Hz  
 AQ 3.9845889 sec  
 RG 161  
 DW 60.800 usec  
 DE 6.50 usec  
 TE 303.0 K  
 D1 1.00000000 sec  
 TD0 1

===== CHANNEL f1 =====  
 NUC1 1H  
 P1 12.00 usec  
 PL -2.00 dB  
 FLL 15.12607274 W  
 SFO1 400.1324710 MHz

F2 - Processing parameters  
 SI 32768  
 SF 400.1300044 MHz  
 WDW EM  
 SSB 0  
 LB 0  
 GB 0  
 PC 1.00

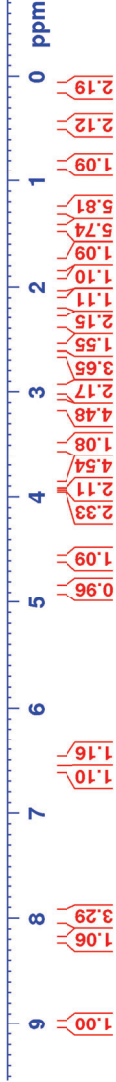

Compound 1

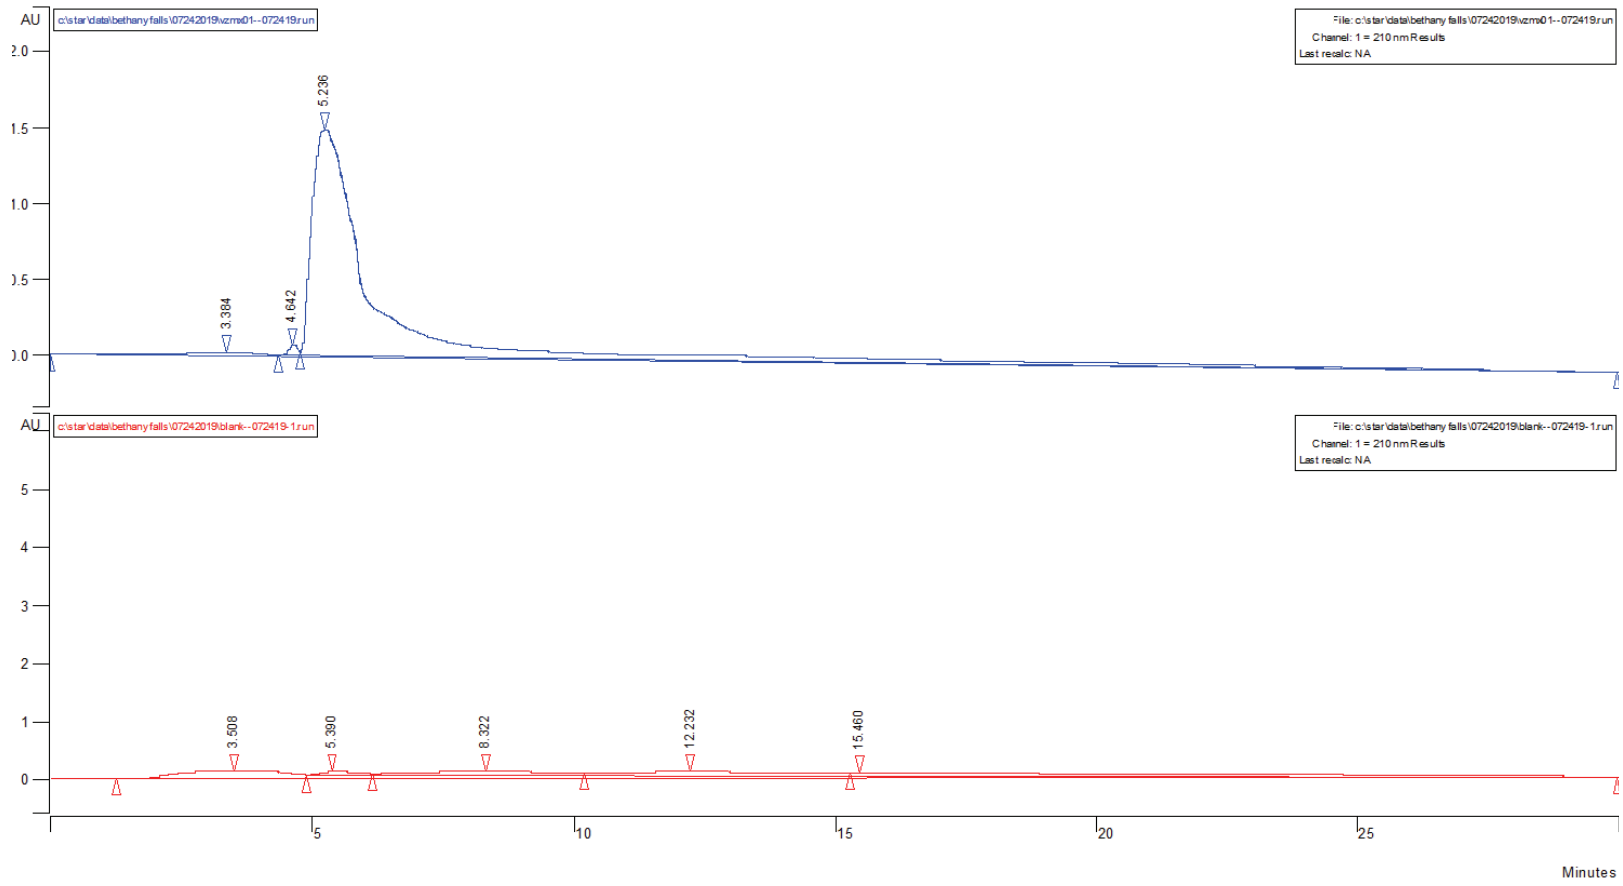

Compound 2

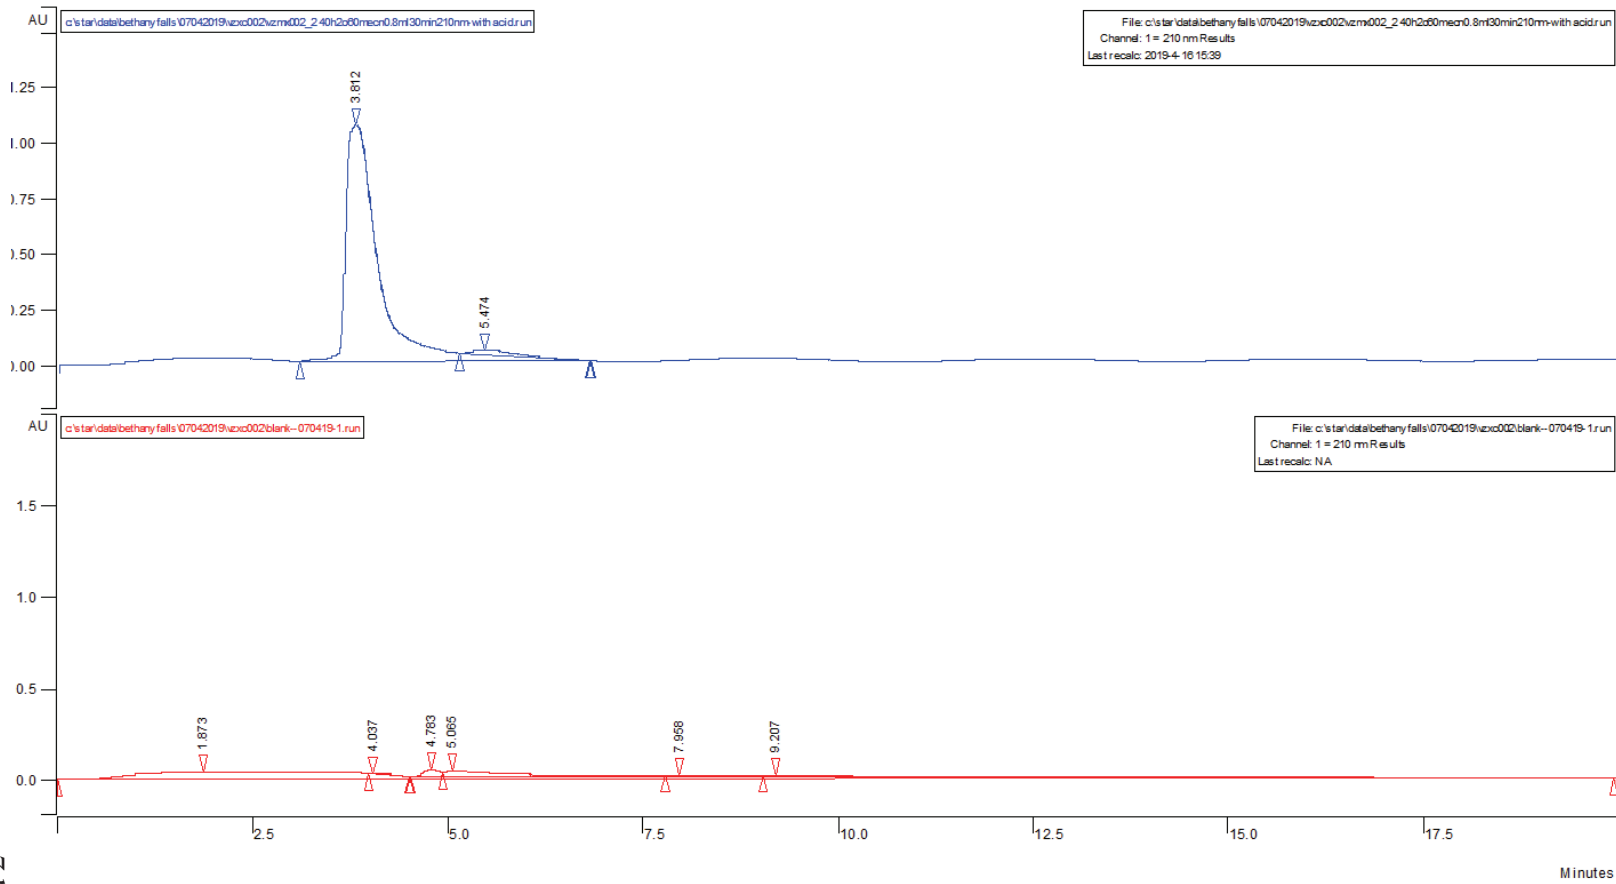

Compound 3

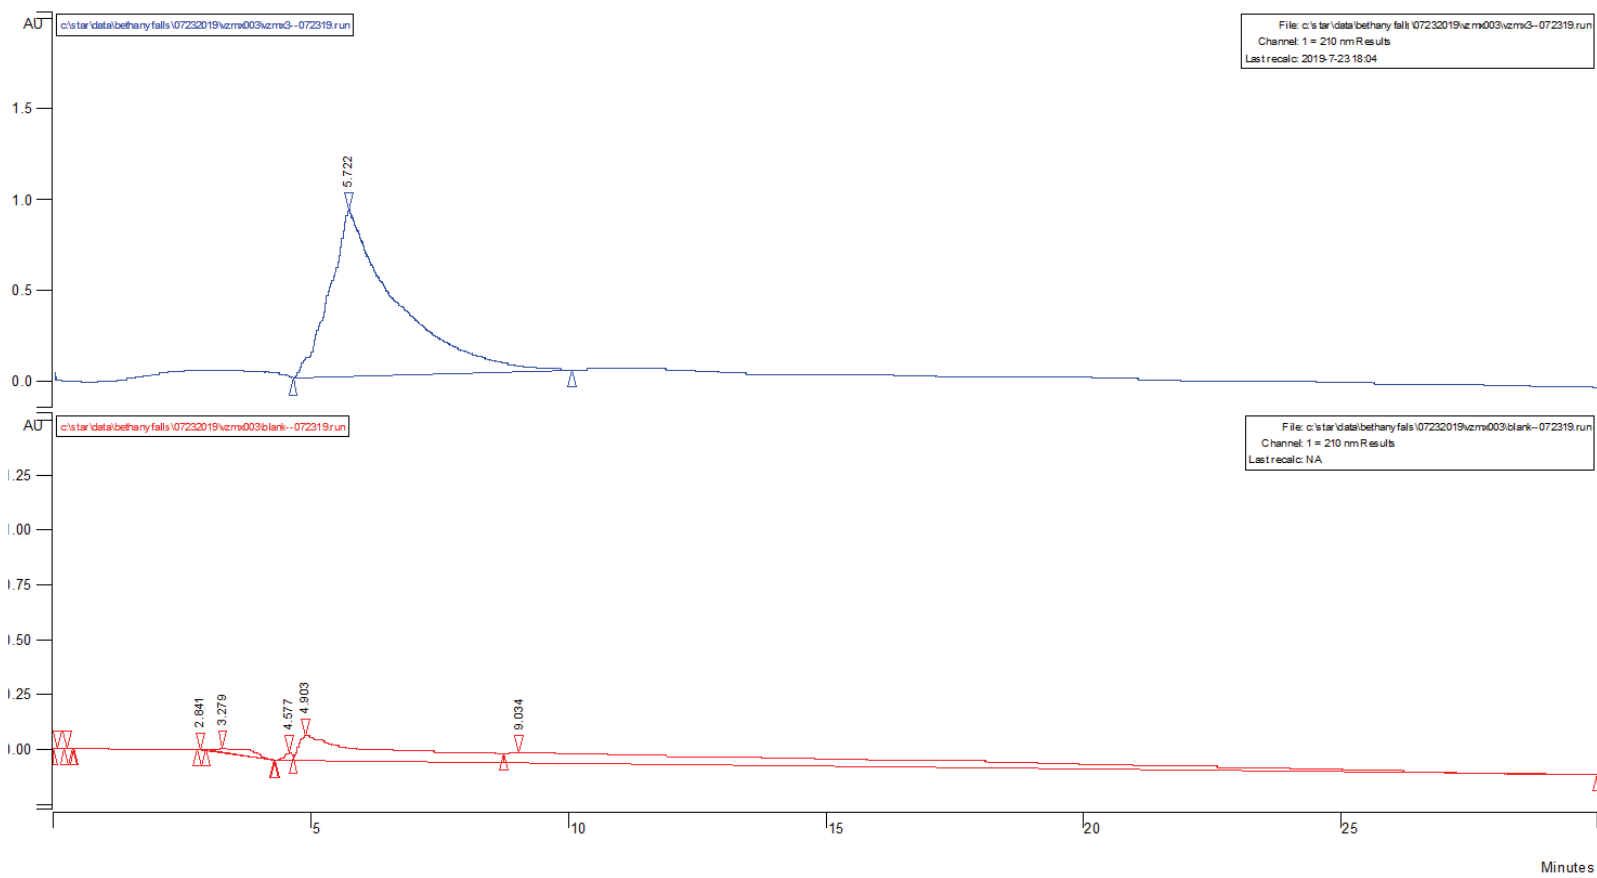

Aug.23,2015  
 C13CPD DMSO /opt/topspin Kang.g 2

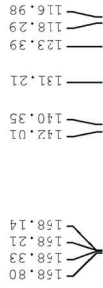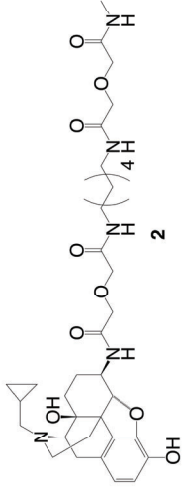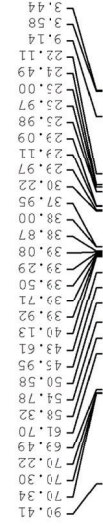

Current Data Parameters  
 NAME GK-II-82\_C  
 EXPNO 10  
 PROCNO 1

F2 - Acquisition Parameters  
 Date\_ 20150823  
 Time 19.11  
 INSTRUM spect  
 PROBHD 5 mm FAPBO BB-  
 PULPROG zgpg30  
 TD 65536  
 SOLVENT DMSO  
 NS 10240  
 DS 4  
 SWH 24038.461 Hz  
 FIDRES 0.366798 Hz  
 AQ 1.3631488 sec  
 RG 203  
 DW 20.800 usec  
 DE 6.50 usec  
 TE 304.5 K  
 D1 2.00000000 sec  
 D11 0.03000000 sec  
 TD0 1

==== CHANNEL f1 =====  
 NUC1 13C  
 P1 8.50 usec  
 PL1 -1.70 dB  
 PL1W 55.73028564 W  
 SF01 100.6228298 MHz

==== CHANNEL f2 =====  
 CPDPRG[2] waltz16  
 NUC2 1H  
 PCPD2 80.00 usec  
 PL2 -2.00 dB  
 PL12 14.50 dB  
 PL13 14.50 dB  
 PL14 14.50 dB  
 PL1Z 15.12807274 W  
 PL1Z 0.33867535 W  
 PL13W 0.33867535 W  
 SF0Z 400.1316005 MHz

F2 - Processing parameters  
 SI 32766  
 SF 100.6128261 MHz  
 NDW 0  
 SSB 0  
 LB 0  
 GB 0  
 PC 1.40

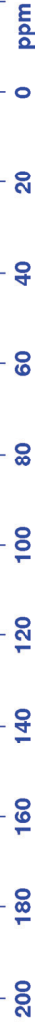



PROTON DMSO /opt/topspin Falls.B 43

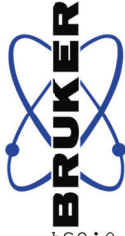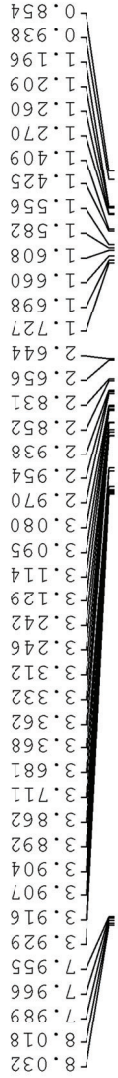

Current Data Parameters  
NAME Bf-II-ititmono  
EXPNO 10  
PROCNO 1

F2 - Acquisition Parameters  
Date\_ 20171107  
Time 10.49  
INSTRUM spect  
PROBHD 5 mm PABBO BB-  
PULPROG zg30  
TD 65536  
SOLVENT DMSO  
NS 16  
DS 2  
SWH 8223.685 Hz  
FIDRES 0.125483 Hz  
AQ 3.9845889 sec  
RG 203  
DW 60.800 usec  
DE 6.50 usec  
TE 299.8 K  
D1 1.00000000 sec  
TD0 1

==== CHANNEL f1 =====  
NUC1 1H  
P1 12.00 usec  
PL 2.00 dB  
FLL 15.12807274 W  
SFO1 400.1324710 MHz

F2 - Processing parameters  
SI 32768  
SF 400.1300022 MHz  
WDW EM  
SSB 0  
LB 0.30 Hz  
GB 0  
PC 1.00

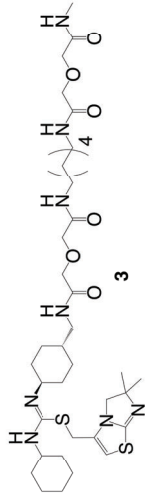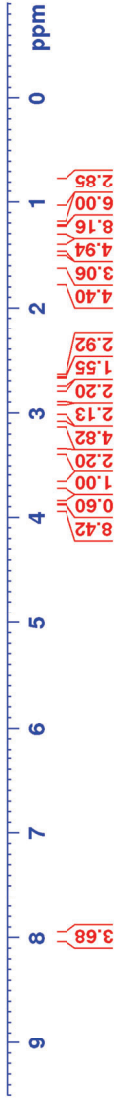

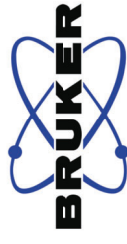

Current Data Parameters  
 NAME BF-III-itlmono  
 EXPNO 60  
 PROCNO 1

F2 - Acquisition Parameters  
 Date\_ 20171114  
 Time 19.02  
 INSTRUM spect  
 PROBHD 5 mm PABBO BB-  
 PULPROG zgpg30  
 TD 65536  
 SOLVENT DMSO  
 NS 1024  
 DS 4  
 SWH 24038.461 Hz  
 FIDRES 0.366798 Hz  
 AQA 1.3631488 sec  
 RG 203  
 DW 20.800 usec  
 DE 6.50 usec  
 TE 300.2 K  
 D1 2.0000000 sec  
 D11 0.0300000 sec  
 TD0 1

==== CHANNEL f1 =====  
 NUC1 13C  
 P1 8.50 usec  
 PL1 -1.70 dB  
 PL1W 55.73028564 W  
 SFO1 100.6228298 MHz

==== CHANNEL f2 =====  
 CPDPRG[2] waltz16  
 NUC2 1H  
 PCPD2 80.00 usec  
 PL2 -2.00 dB  
 PL12 14.50 dB  
 PL13 14.50 dB  
 PL1W 15.12807274 W  
 PL12W 0.33867535 W  
 PL13W 0.33867535 W  
 SFO2 400.1316005 MHz

F2 - Processing Parameters  
 SI 32768  
 SF 100.6128193 MHz  
 GB 0  
 SSB 0  
 LB 0  
 GB 0  
 PC 1.40  
 LB 1.40

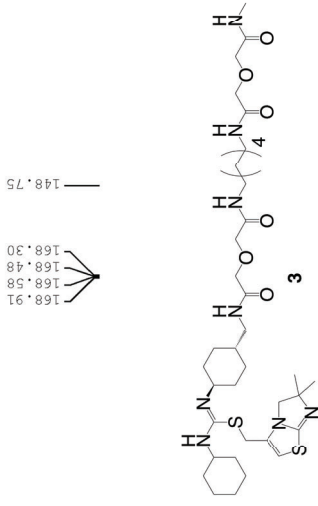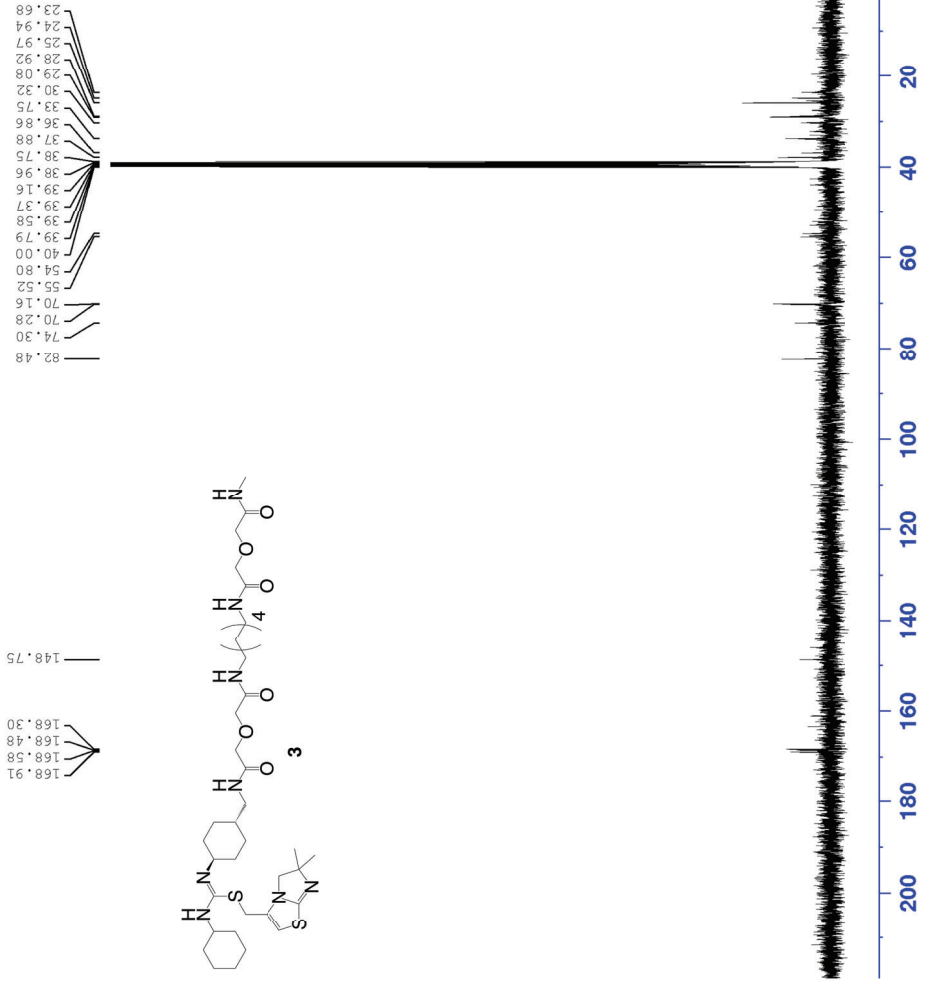

Supplement: MD-011-C9MD00433E-s001.pdf [file MD-011-C9MD00433E-s001.pdf]
